# Supplementary material
Source: HighWire-hosted journal article supplement (https://jech.bmj.com/content/jech-2021-217090)
Supplement: inline-supplementary-material-1 [file inline-supplementary-material-1.pdf]

## Supplementary Material

### Contents

| Description                                                                                    | Page |
|------------------------------------------------------------------------------------------------|------|
| Read version 2 medication codes                                                                | 2    |
| Codes used to identify all-cause dementia and Alzheimer's disease cases                        | 61   |
| Supplementary Results: Medications predicted a priori to be associated with dementia (Group 1) | 65   |

## Read version 2 medication codes

| Read code | Medication                                                   |
|-----------|--------------------------------------------------------------|
| a...      | GASTRO-INTESTINAL DRUGS                                      |
| a1...     | OFFICIAL/SIMPLE ANTACIDS                                     |
| a11..     | ALUMINIUM HYDROXIDE [ANTACID]                                |
| a12..     | MAGNESIUM SALTS-ANTACID                                      |
| a13..     | SODIUM BICARBONATE [ANTACID]                                 |
| a14..     | SODIUM CITRATE [ANTACID]                                     |
| a2...     | COMPOUND ANTACIDS                                            |
| a21..     | GENERIC ANTACIDS                                             |
| a22..     | COMPOUND PROPRIETARY ANTACIDS A-C                            |
| a23..     | COMPOUND PROPRIETARY ANTACIDS D-L                            |
| a24..     | COMPOUND PROPRIETARY ANTACIDS M-Z                            |
| a3...     | CALCIUM/BISMUTH ANTACIDS                                     |
| a31..     | CALCIUM/BISMUTH ANTACIDS A-Z                                 |
| a4...     | ANTISPASMODICS/GASTRO-INTESTIN TRACT MOTILITY ALTERING DRUGS |
| a41..     | ATROPINE SULPHATE [ANTISPASMODIC]                            |
| a42..     | *ATROPINE METHONITRATE                                       |
| a43..     | *AMBUTONIUM BROMIDE                                          |
| a44..     | BELLADONNA ALKALOIDS                                         |
| a45..     | DICYCLOVERINE HYDROCHLORIDE                                  |
| a46..     | GLYCOPYRRONIUM BROMIDE [ANTISPASMODIC]                       |
| a47..     | HYOSCINE BUTYLBROMIDE                                        |
| a48..     | MEPENZOLATE BROMIDE                                          |
| a49..     | PIPENZOLATE BROMIDE                                          |
| a4a..     | *PIPERIDOLATE HYDROCHLORIDE                                  |
| a4b..     | *POLDINE METHYLSULPHATE                                      |
| a4c..     | PROPANTHELINE BROMIDE [ANTISPASMODIC]                        |
| a4d..     | ALVERINE CITRATE                                             |
| a4e..     | MEBEVERINE HYDROCHLORIDE                                     |
| a4f..     | PEPPERMINT OIL                                               |
| a4g..     | DOMPERIDONE(MOTILITY) [see chapter d for preparations]       |
| a4h..     | METOCLOPRAMIDE(MOTILITY) [see chapter d for preparations]    |
| a4i..     | LINACLOTIDE                                                  |
| a5...     | COMPOUND ANTISPASMODICS                                      |
| a51..     | COMPOUND ANTISPASMODICS A-Z                                  |
| a6...     | ULCER-HEALING DRUGS                                          |
| a61..     | CIMETIDINE                                                   |
| a62..     | RANITIDINE                                                   |
| a63..     | PIRENZEPINE                                                  |
| a64..     | BISMUTH CHELATE                                              |
| a65..     | SUCRALFATE                                                   |
| a66..     | CARBENOXOLONE SODIUM [GASTRO-INTESTINAL USE]                 |
| a67..     | LIQUORICE DEGLYCYRRHIZINISED                                 |

|       |                                                         |
|-------|---------------------------------------------------------|
| a68.. | FAMOTIDINE                                              |
| a69.. | NIZATIDINE                                              |
| a6a.. | MISOPROSTOL                                             |
| a6b.. | OMEPRAZOLE                                              |
| a6c.. | LANSOPRAZOLE                                            |
| a6d.. | RANITIDINE BISMUTH CITRATE                              |
| a6e.. | PANTOPRAZOLE                                            |
| a6f.. | RABEPRAZOLE SODIUM                                      |
| a6g.. | COMBINATION ULCER HEALING DRUGS                         |
| a6h.. | ESOMEPRAZOLE                                            |
| a7... | ANTIDIARRHOEAL ADSORBENT MIXTURE                        |
| a71.. | KAOLIN, LIGHT                                           |
| a72.. | *CERATONIA                                              |
| a73.. | CHALK                                                   |
| a75.. | METHYLCELLULOSE [ANTIDIARRHOEAL]                        |
| a76.. | *STERCULIA [ANTIDIARRHOEAL]                             |
| a8... | ANTIDIARRHOEAL-MOTILITY REDUCTION                       |
| a81.. | CODEINE PHOSPHATE [GASTRO-INTESTINAL TRACT USE]         |
| a82.. | DIPHENOXYLATE HYDROCHLORIDE                             |
| a83.. | LOPERAMIDE HYDROCHLORIDE                                |
| a84.. | OPIUM AND MORPHINE                                      |
| a85.. | LOPERAMIDE HYDROCHLORIDE+SIMETHICONE                    |
| a9... | OTHER ANTIDIARRHOEAL PREPARATIONS                       |
| a91.. | OTHER ANTIDIARRHOEAL PREPARATIONS A-Z                   |
| aa... | CHRONIC DIARRHOEA TREATMENT                             |
| aa1.. | AZATHIOPRINE [GASTROINTESTINAL]                         |
| aa2.. | COLESTYRAMINE [ANTIDIARRHOEAL USE]                      |
| aa3.. | MESALAZINE                                              |
| aa4.. | PREDNISOLONE [for preparations see rectal prednisolone] |
| aa5.. | SODIUM CROMOGLICATE [GASTRO-INTESTINAL USE]             |
| aa6.. | SULFASALAZINE [GASTRO-INTESTINAL USE]                   |
| aa7.. | OLSALAZINE SODIUM                                       |
| aa8.. | *MESALAZINE DUPLICATE DELETED                           |
| aa9.. | BUDESONIDE [GASTRO-INTESTINAL USE]                      |
| aaA.. | BALSALAZIDE DISODIUM                                    |
| aaB.. | BECLOMETASONE [GASTRO-INTESTINAL USE]                   |
| ab... | BULK FORMING DRUGS [GASTRO-INTESTINAL USE]              |
| ab1.. | BRAN                                                    |
| ab2.. | ISPAGHULA HUSK [GASTRO-INTESTINAL BULK LAXATIVE]        |
| ab3.. | METHYLCELLULOSE [GASTRO-INTESTINAL BULK LAXATIVE]       |
| ab4.. | STERCULIA [BULK LAXATIVE]                               |
| ac... | STIMULANT LAXATIVES                                     |
| ac1.. | BISACODYL                                               |
| ac2.. | CASCARA                                                 |
| ac3.. | CASTOR OIL [LAXATIVE]                                   |

|       |                                          |
|-------|------------------------------------------|
| ac4.. | DANTRON                                  |
| ac5.. | DOCUSATE SODIUM                          |
| ac6.. | FIG                                      |
| ac7.. | SENNA                                    |
| ac8.. | SODIUM PICOSULFATE                       |
| ad... | FAECAL SOFTENERS                         |
| ad1.. | LIQUID PARAFFIN [LAXATIVE]               |
| ae... | OSMOTIC LAXATIVES                        |
| ae1.. | LACTULOSE                                |
| ae2.. | MAGNESIUM HYDROXIDE [LAXATIVE]           |
| ae3.. | MAGNESIUM SULFATE                        |
| ae4.. | POLYETHYLENE GLYCOL ELECTROLYTE          |
| ae5.. | MAGNESIUM CITRATE                        |
| ae6.. | LACTITOL                                 |
| ae7.. | SODIUM PHOSPHATE                         |
| af... | RECTALLY GIVEN LAXATIVES                 |
| af1.. | RECTAL LAXATIVES A-Z                     |
| ag... | OTHER LAXATIVES                          |
| ag1.. | OTHER LAXATIVES A-Z                      |
| ah... | RECTAL SOOTHING AGENTS                   |
| ah1.. | RECTAL SOOTHER A-Z                       |
| ai... | RECTAL CORTICOSTEROIDS                   |
| ai1.. | RECTAL HYDROCORTISONE                    |
| ai2.. | RECTAL PREDNISOLONE                      |
| ai3.. | RECTAL BUDESONIDE                        |
| aj... | RECTAL COMPOUNDS WITH STEROIDS           |
| aj1.. | RECTAL COMPOUNDS+STEROIDS A-Z            |
| ak... | OTHER RECTAL PREPARATIONS                |
| ak1.. | PHENOL [RECTAL]                          |
| ak2.. | RECTAL GLYCERYL TRINITRATE               |
| al... | *STOMA CARE [see chapter s]              |
| al1.. | STOMA ADHESIVES [see chapter s]          |
| al2.. | STOMA ADHESIVE REMOVERS [see chapter s]  |
| al3.. | *STOMA DEODORANTS [see chap s]           |
| al4.. | STOMA SKIN "HELPERS" [see chapter s]     |
| al5.. | *STOMA PATIENT PRESCRIBING               |
| am... | GALL BLADDER DRUGS                       |
| am1.. | CHENODEOXYCHOLIC ACID                    |
| am2.. | DEHYDROCHOLIC ACID                       |
| am3.. | URSODEOXYCHOLIC ACID                     |
| am4.. | OTHER BILIARY DRUGS                      |
| am5.. | CHENO- + URSO- DEOXYCHOLIC ACID          |
| an... | GASTRIC ACIDITY INCREASE DRUGS           |
| an1.. | GASTRIC ACIDITY INCREASERS A-Z           |
| ao... | APROTININ [PANCREATITIS] [see chapter b] |

|       |                                          |
|-------|------------------------------------------|
| ao1.. | APROTININ [PANCREATITIS] [see chapter b] |
| ap... | PANCREATIN SUPPLEMENTS                   |
| ap1.. | PANCREATIN                               |
| aq... | EMETICS                                  |
| aq1.. | IPECACUANHA                              |
| ar... | ADSORBENTS                               |
| ar1.. | CHARCOAL ACTIVATED                       |
| ar2.. | FULLER'S EARTH                           |
| as... | CYANIDE POISONING [ANTIDOTE]             |
| as1.. | DICOBALT EDETATE                         |
| as2.. | SODIUM NITRITE                           |
| as3.. | SODIUM THIOSULFATE                       |
| as4.. | AMYL NITRITE                             |
| at... | HEAVY METAL POISONING [ANTIDOTE]         |
| at1.. | DIMERCAPROL                              |
| at2.. | SODIUM CALCIUM EDETATE                   |
| au... | ORGANOPHOSPHORUS POISONING               |
| au1.. | PRALIDOXIME MESYLATE                     |
| au2.. | PRALIDOXIME CHLORIDE                     |
| av... | HELICOBACTER PYLORI DIAGNOSTIC TEST      |
| av1.. | UREA [13C]                               |
| aw... | PERIPHERALLY ACTING ANTI-OBESITY DRUGS   |
| aw1.. | ORLISTAT                                 |
| ax... | OPIOID ANTAGONIST                        |
| ax1.. | METHYLNALTREXONE BROMIDE                 |
| ax2.. | NALOXEGOL                                |
| ay... | ANTIDIARRHOEAL ANTISECRETORY             |
| ay1.. | RACECADOTRIL                             |
| az... | OTHER GASTROINTESTINAL DRUGS             |
| az1.. | TEDUGLUTIDE                              |
| b.... | CARDIOVASCULAR DRUGS                     |
| b1... | CARDIAC GLYCOSIDES                       |
| b11.. | DIGOXIN                                  |
| b12.. | DIGITOXIN                                |
| b13.. | *LANATOSIDE C                            |
| b14.. | *MEDIGOXIN                               |
| b15.. | *OUABAIN                                 |
| b16.. | DIGOXIN SPECIFIC ANTIBODY                |
| b2... | THIAZIDE DIURETICS                       |
| b21.. | BENDROFLUMETHIAZIDE                      |
| b22.. | CHLOROTHIAZIDE                           |
| b23.. | CHLORTALIDONE                            |
| b24.. | CLOPAMIDE [INGREDIENT see bdek]          |
| b25.. | CYCLOPENTHIAZIDE                         |
| b26.. | HYDROCHLOROTHIAZIDE                      |

|       |                                                                 |
|-------|-----------------------------------------------------------------|
| b27.. | HYDROFLUMETHIAZIDE                                              |
| b28.. | INDAPAMIDE                                                      |
| b29.. | MEFRUSIDE                                                       |
| b2a.. | *METHYCLOTHIAZIDE                                               |
| b2b.. | METOLAZONE                                                      |
| b2c.. | POLYTHIAZIDE                                                    |
| b2d.. | XIPAMIDE                                                        |
| b3... | LOOP DIURETICS                                                  |
| b31.. | FUROSEMIDE                                                      |
| b32.. | BUMETANIDE                                                      |
| b33.. | ETACRYNIC ACID                                                  |
| b34.. | PIRETANIDE                                                      |
| b35.. | TORASEMIDE                                                      |
| b4... | POTASSIUM SPARING DIURETICS                                     |
| b41.. | AMILORIDE HYDROCHLORIDE                                         |
| b42.. | POTASSIUM CANRENOATE                                            |
| b43.. | SPIRONOLACTONE                                                  |
| b44.. | TRIAMTERENE                                                     |
| b45.. | EPLERENONE                                                      |
| b5... | POTASSIUM SPARING COMPOUND DIURETICS                            |
| b51.. | POTASSIUM SPARING COMPOUND DIURETICS A-Z                        |
| b6... | OSMOTIC DIURETICS                                               |
| b61.. | MANNITOL                                                        |
| b62.. | *UREA                                                           |
| b7... | MERCURIAL DIURETICS                                             |
| b71.. | MERSALYL                                                        |
| b8... | CARBONIC ANHYDRASE INHIBITORS [NO DRUGS HERE]                   |
| b9... | DIURETICS+POTASSIUM SUPPLEMENT                                  |
| b91.. | DIURETICS+POTASSIUM SUPPLEMENT A-Z                              |
| ba... | INDIVIDUAL ARRHYTHMIAS [NO DRUGS HERE]                          |
| bA... | CALCIUM-CHANNEL BLOCKER+ANGIOTENSIN-CONVERTING ENZYME INHIBITOR |
| bA1.. | FELODIPINE+RAMIPRIL                                             |
| bb... | SUPRAVENTRICULAR ARRHYTHMIAS                                    |
| bB... | IF INHIBITOR                                                    |
| bb1.. | AMIODARONE HYDROCHLORIDE                                        |
| bB1.. | IVABRADINE                                                      |
| bb2.. | ATROPINE SULFATE [ANTIARRHYTHMIC]                               |
| bb3.. | VERAPAMIL HYDROCHLORIDE                                         |
| bb4.. | DRONEDARONE HYDROCHLORIDE                                       |
| bc... | VENTRICULAR ARRHYTHMIA DRUGS                                    |
| bC... | BRADYKININ ANTAGONIST                                           |
| bc1.. | BRETYLIUM TOSYLATE                                              |
| bC1.. | ICATIBANT                                                       |
| bc2.. | DISOPYRAMIDE                                                    |
| bc3.. | FLECAINIDE ACETATE                                              |

|       |                                            |
|-------|--------------------------------------------|
| bc4.. | LIDOCAINE HYDROCHLORIDE [ANTIARRHYTHMIC]   |
| bc5.. | MEXILETINE HYDROCHLORIDE                   |
| bc6.. | PHENYTOIN SODIUM [ANTIARRHYTHMIC]          |
| bc7.. | *PRACTOLOL [ANTIARRHYTHMIC]                |
| bc8.. | PROCAINAMIDE HYDROCHLORIDE                 |
| bc9.. | QUINIDINE                                  |
| bca.. | TOCAINIDE HYDROCHLORIDE                    |
| bcb.. | PROPAPENONE HYDROCHLORIDE                  |
| bcc.. | ADENOSINE                                  |
| bcd.. | MORACIZINE HYDROCHLORIDE                   |
| bd... | BETA-ADRENOCEPTOR BLOCKERS                 |
| bD... | OTHER ANTIANGINAL DRUGS                    |
| bd1.. | PROPRANOLOL HYDROCHLORIDE                  |
| bD1.. | RANOLAZINE                                 |
| bd2.. | ACEBUTOLOL                                 |
| bd3.. | ATENOLOL                                   |
| bd4.. | BETAXOLOL HCL [B-BLOCKER]                  |
| bd5.. | LABETALOL HYDROCHLORIDE                    |
| bd6.. | METOPROLOL TARTRATE                        |
| bd7.. | NADOLOL                                    |
| bd8.. | OXPRENOLOL HYDROCHLORIDE                   |
| bd9.. | PENBUTOLOL SULPHATE[INGREDIENT]            |
| bda.. | PINDOLOL                                   |
| bdb.. | *PRACTOLOL [B-BLOCKER]                     |
| bdc.. | SOTALOL HYDROCHLORIDE                      |
| bdd.. | TIMOLOL MALEATE [B-BLOCKER]                |
| bde.. | COMPOUND BETA-BLOCKERS                     |
| bdf.. | BISOPROLOL FUMARATE                        |
| bdg.. | *XAMOTEROL FUMARATE                        |
| bdh.. | *METOPROLOL FUMARATE                       |
| bdi.. | *CARTEOLOL HYDROCHLORIDE                   |
| bdj.. | CELIPROLOL HYDROCHLORIDE                   |
| bdk.. | ESMOLOL HYDROCHLORIDE                      |
| bdl.. | CARVEDILOL                                 |
| bdm.. | NEBIVOLOL                                  |
| bdn.. | PROPRANOLOL HYDROCHLORIDE [2]              |
| be... | VASODILATOR ANTIHYPERTENSIVES              |
| bE... | OTHER CARDIAC PREPARATIONS                 |
| be1.. | DIAZOXIDE [CARDIOVASCULAR USE]             |
| bE1.. | REGADENOSON                                |
| be2.. | HYDRALAZINE HYDROCHLORIDE                  |
| be3.. | MINOXIDIL                                  |
| be4.. | SODIUM NITROPRUSSIDE                       |
| bf... | CENTRAL ANTIHYPERTENSIVES                  |
| bf1.. | CLONIDINE HYDROCHLORIDE [ANTIHYPERTENSIVE] |

|       |                                                     |
|-------|-----------------------------------------------------|
| bf2.. | METHYLDOPA                                          |
| bf3.. | RESERPINE/RAUWOLFIA ALKALOIDS                       |
| bf4.. | MOXONIDINE                                          |
| bg... | ADRENERGIC NEURONE BLOCKERS                         |
| bg1.. | BETANIDINE SULFATE                                  |
| bg2.. | DEBRISOQUINE                                        |
| bg3.. | GUANETHIDINE MONOSULFATE [ANTIHYPERTENSIVE]         |
| bh... | ALPHA-ADRENOCEPTOR BLOCKERS                         |
| bh1.. | INDORAMIN                                           |
| bh2.. | PHENOXYBENZAMINE HYDROCHLORIDE [CARDIOVASCULAR USE] |
| bh3.. | PHENTOLAMINE MESYLATE                               |
| bh4.. | PRAZOSIN HYDROCHLORIDE                              |
| bh5.. | TERAZOSIN HYDROCHLORIDE                             |
| bh6.. | DOXAZOSIN                                           |
| bi... | ANGIOTENSIN-CONVERTING ENZYME INHIBITORS            |
| bi1.. | CAPTOPRIL                                           |
| bi2.. | ENALAPRIL MALEATE                                   |
| bi3.. | LISINOPRIL                                          |
| bi4.. | QUINAPRIL                                           |
| bi5.. | PERINDOPRIL ERBUMINE                                |
| bi6.. | RAMIPRIL                                            |
| bi7.. | SODIUM FOSINOPRIL                                   |
| bi8.. | CILAZAPRIL                                          |
| bi9.. | TRANDOLAPRIL                                        |
| biA.. | MOEXIPRIL                                           |
| biB.. | IMIDAPRIL HYDROCHLORIDE                             |
| biC.. | PERINDOPRIL ARGININE                                |
| bj... | GANGLION BLOCKING DRUGS                             |
| bj1.. | TRIMETAPHAN                                         |
| bk... | OTHER ANTIHYPERTENSIVES                             |
| bk1.. | METIROSE                                            |
| bk2.. | ANTIHYPERTENSIVES+BARBITURATES                      |
| bk3.. | LOSARTAN                                            |
| bk4.. | VALSARTAN                                           |
| bk5.. | IRBESARTAN                                          |
| bk6.. | TRANDOLAPRIL+VERAPAMIL HYDROCHLORIDE                |
| bk7.. | CANDESARTAN CILEXETIL                               |
| bk8.. | TELMISARTAN                                         |
| bk9.. | EPROSARTAN                                          |
| bkA.. | BOSENTAN                                            |
| bkB.. | OLMESARTAN                                          |
| bkC.. | HYDROCHLOROTHIAZIDE + OLMESARTAN                    |
| bkD.. | AMLODIPINE + VALSARTAN                              |
| bkE.. | SITAXENTAN                                          |
| bkF.. | ALISKIREN                                           |



|       |                                                |
|-------|------------------------------------------------|
| bkG.. | AMBRISENTAN                                    |
| bkH.. | OLMESARTAN+AMLODIPINE                          |
| bkI.. | OLMESARTAN+AMLODIPINE+HYDROCHLOROTHIAZIDE      |
| bkJ.. | AZILSARTAN                                     |
| bkK.. | MACITENTAN                                     |
| bl... | VASODILATORS USED IN ANGINA PECTORIS           |
| bl1.. | GLYCERYL TRINITRATE                            |
| bl2.. | ISOSORBIDE DINITRATE                           |
| bl3.. | ISOSORBIDE MONONITRATE                         |
| bl4.. | PENTAERITHRITYL TETRANITRATE                   |
| bl5.. | DILTIAZEM HYDROCHLORIDE                        |
| bl6.. | *LIDOFLAZINE                                   |
| bl7.. | NICARDIPINE HYDROCHLORIDE                      |
| bl8.. | NIFEDIPINE                                     |
| bl9.. | *PRENYLAMINE                                   |
| bla.. | ISRADIPINE                                     |
| blb.. | AMLODIPINE                                     |
| blc.. | FELODIPINE                                     |
| bld.. | *FLOSEQUINAN                                   |
| ble.. | LACIDIPINE                                     |
| blf.. | NICORANDIL                                     |
| blg.. | NISOLDIPINE                                    |
| blh.. | LERCANIDIPINE HYDROCHLORIDE                    |
| bli.. | MIBEFRADIL                                     |
| blj.. | DILTIAZEM HYDROCHLORIDE 2                      |
| blk.. | ISOSORBIDE MONONITRATE 2                       |
| bll.. | NIFEDIPINE [2]                                 |
| blm.. | ISOSORBIDE MONONITRATE+ASPIRIN                 |
| bly.. | ISOSORBIDE DINITRATE [GENERIC ADDITIONS]       |
| blz.. | GLYCERYL TRINITRATE [GENERIC ADDITIONS]        |
| bm... | VASODILATORS IN HEART FAILURE [NO DRUGS HERE]  |
| bn... | PERIPHERAL VASODILATORS                        |
| bn1.. | *BAMETHAN SULPHATE                             |
| bn2.. | CINNARIZINE [VASODILATOR]                      |
| bn3.. | NICOTINIC ACID DERIVATIVES                     |
| bn4.. | PENTOXIFYLLINE                                 |
| bn5.. | MOXISYLYTE                                     |
| bn6.. | OTHER PERIPHERAL VASCULAR DISEASE DRUGS        |
| bn7.. | ILOPROST                                       |
| bo... | CEREBRAL VASODILATORS                          |
| bo1.. | CO-DERGOCRINE MESYLATE                         |
| bo2.. | *CYCLANDELATE                                  |
| bo3.. | ISOXSUPRINE HYDROCHLORIDE [CARDIOVASCULAR USE] |
| bo4.. | NAFTIDROFURYL OXALATE                          |
| bp... | ADRENALINE + INOTROPICS                        |

|       |                                                   |
|-------|---------------------------------------------------|
| bp1.. | ADRENALINE [CARDIOVASCULAR USE]                   |
| bp2.. | DOBUTAMINE HYDROCHLORIDE                          |
| bp3.. | DOPAMINE HYDROCHLORIDE                            |
| bp4.. | ISOPRENALINE HYDROCHLORIDE                        |
| bp5.. | XAMOTEROL [SYMPATHOMIMETIC]                       |
| bp6.. | DOPEXAMINE HYDROCHLORIDE                          |
| bq... | VASOCONSTRICTING SYMPATHOMIMETIC                  |
| bq1.. | METARAMINOL                                       |
| bq2.. | METHOXAMINE HYDROCHLORIDE                         |
| bq3.. | NORADRENALINE ACID TARTRATE                       |
| bq4.. | *OXEDRINE TARTRATE                                |
| bq5.. | PHENYLEPHRINE HYDROCHLORIDE [CVS SYMPATHOMIMETIC] |
| bq6.. | EPHEDRINE HYDROCHLORIDE                           |
| bq7.. | MIDODRINE                                         |
| br... | PARENTERAL ANTICOAGULANTS                         |
| br1.. | HEPARIN INTRAVENOUS                               |
| br2.. | HEPARIN SUBCUTANEOUS                              |
| br3.. | HEPARIN FLUSHES                                   |
| br4.. | ANCROD                                            |
| br5.. | EPOPROSTENOL                                      |
| br6.. | ENOXAPARIN                                        |
| br7.. | TINZAPARIN SODIUM                                 |
| br8.. | DANAPAROID SODIUM                                 |
| br9.. | CERTOPARIN SODIUM                                 |
| brA.. | LEPIRUDIN                                         |
| brB.. | DESIRUDIN                                         |
| brC.. | REVIPARIN SODIUM                                  |
| brD.. | FONDAPARINUX                                      |
| brE.. | BEMIPARIN                                         |
| brF.. | BIVALIRUDIN                                       |
| brG.. | ARGATROBAN                                        |
| brH.. | DEFIBROTIDE                                       |
| bs... | ORAL ANTICOAGULANTS                               |
| bs1.. | WARFARIN SODIUM                                   |
| bs2.. | ACENOCOUMAROL                                     |
| bs3.. | PHENINDIONE                                       |
| bs4.. | DABIGATRAN ETEXILATE                              |
| bs5.. | *DICOUMAROL [NO DRUGS HERE]                       |
| bs6.. | RIVAROXABAN                                       |
| bs7.. | APIXABAN                                          |
| bs8.. | EDOXABAN                                          |
| bt... | PROTAMINE SULFATE                                 |
| bt1.. | PROTAMINE SULFATE                                 |
| bu... | ANTIPLATELET DRUGS                                |
| bu1.. | DIPYRIDAMOLE                                      |

|       |                                    |
|-------|------------------------------------|
| bu2.. | ASPIRIN [ANTIPLATELET]             |
| bu3.. | ABCIXIMAB                          |
| bu4.. | DIPYRIDAMOLE+ASPIRIN               |
| bu5.. | CLOPIDOGREL                        |
| bu6.. | TICLOPIDINE                        |
| bu7.. | EPTIFIBATIDE                       |
| bu8.. | TIROFIBAN                          |
| bu9.. | CILOSTAZOL                         |
| buA.. | PRASUGREL                          |
| buB.. | TICAGRELOR                         |
| bv... | FIBRINOLYTIC DRUGS                 |
| bv1.. | STREPTOKINASE                      |
| bv2.. | UROKINASE                          |
| bv3.. | ALTEPLASE                          |
| bv4.. | ANISTREPLASE                       |
| bv5.. | RETEPLASE                          |
| bv6.. | TENECTEPLASE                       |
| bv7.. | DROTRECOGIN ALFA (ACTIVATED)       |
| bw... | ANTIFIBRINOLYTICS/HAEMOSTATICS     |
| bw1.. | *ETAMSYLATE                        |
| bw2.. | *THROMBOPLASTIN                    |
| bw3.. | TRANEXAMIC ACID                    |
| bw5.. | *APROTININ [FIBRINOLYTIC]          |
| bw6.. | FACTOR VIII                        |
| bw7.. | COLLAGEN [HAEMOSTATIC]             |
| bw8.. | FACTOR IX                          |
| bw9.. | FACTOR VIIa                        |
| bwA.. | FACTOR VIII+VON WILLEBRAND FACTOR  |
| bwB.. | FACTOR XIII PRODUCTS               |
| bwC.. | FIBRINOGEN+THROMBIN                |
| bwD.. | ANTITHROMBIN III                   |
| bwE.. | HUMAN PROTHROMBIN COMPLEX          |
| bwF.. | ROMIPLOSTIM                        |
| bwG.. | ELTROMBOPAG OLAMINE                |
| bwH.. | HUMAN FIBRINOGEN                   |
| bwI.. | VON WILLEBRAND FACTOR              |
| bwJ.. | FACTOR VIII (2)                    |
| bx... | LIPID-LOWERING DRUGS               |
| bx1.. | BEZAFIBRATE                        |
| bx2.. | COLESTYRAMINE [LIPID LOWERING USE] |
| bx3.. | CLOFIBRATE                         |
| bx4.. | COLESTIPOL HYDROCHLORIDE           |
| bx5.. | *DEXTROTHYROXINE SODIUM            |
| bx6.. | GEMFIBROZIL                        |
| bx7.. | *NICOFURANOSE                      |

|        |                                            |
|--------|--------------------------------------------|
| bx8..  | NICOTINIC ACID                             |
| bx9..  | PROBUCOL                                   |
| bx a.. | OMEGA-3 MARINE TRIGLYCERIDES               |
| bx b.. | ACIPIMOX                                   |
| bx c.. | FENOFIBRATE                                |
| bx d.. | SIMVASTATIN                                |
| bx e.. | PRAVASTATIN SODIUM                         |
| bx f.. | CIPROFIBRATE                               |
| bx g.. | FLUVASTATIN SODIUM                         |
| bx h.. | ISPAGHULA HUSK [LIPID LOWERING USE]        |
| bx i.. | ATORVASTATIN                               |
| bx j.. | CERIVASTATIN                               |
| bx k.. | ROSUVASTATIN                               |
| bx l.. | EZETIMIBE                                  |
| bx m.. | COLESEVELAM HYDROCHLORIDE                  |
| bx n.. | LOMITAPIDE                                 |
| bx o.. | EVOLOCUMAB                                 |
| by...  | LOCAL SCLEROSANTS                          |
| by1..  | ETHANOLAMINE OLEATE                        |
| by2..  | SODIUM TETRADECYL SULFATE                  |
| bz...  | POSITIVE INOTROPIC DRUGS                   |
| bz1..  | ENOXIMONE                                  |
| bz2..  | MILRINONE                                  |
| c....  | RESPIRATORY DRUGS                          |
| c1...  | SELECTIVE BETA-ADRENOCEPTOR STIMULANT      |
| c11..  | SALBUTAMOL [ORAL PREPARATIONS]             |
| c12..  | SALBUTAMOL [PARENTERAL PREPARATIONS]       |
| c13..  | SALBUTAMOL [INHALATION PREPARATIONS]       |
| c14..  | TERBUTALINE SULFATE [RESPIRATORY USE]      |
| c15..  | FENOTEROL HYDROBROMIDE                     |
| c16..  | PIRBUTEROL                                 |
| c17..  | REPROTEROL HYDROCHLORIDE                   |
| c18..  | RIMITEROL HYDROBROMIDE                     |
| c19..  | SALMETEROL XINAFOATE                       |
| c1 a.. | TULOBUTEROL HYDROCHLORIDE                  |
| c1 A.. | SALINE FOR NEBULISATION                    |
| c1 b.. | INDACATEROL                                |
| c1 B.. | BAMBUTEROL HYDROCHLORIDE                   |
| c1 c.. | FLUTICASONE PROPIONATE+FORMOTEROL FUMARATE |
| c1 C.. | FORMOTEROL                                 |
| c1 d.. | OLODATEROL                                 |
| c1 D.. | SALMETEROL+FLUTICASONE PROPIONATE          |
| c1 e.. | INDACATEROL+GLYCOPYRRONIUM                 |
| c1 E.. | SALBUTAMOL [INHALATION PREPARATIONS 2]     |
| c2...  | OTHER ADRENOCEPTOR STIMULANTS              |

|       |                                                |
|-------|------------------------------------------------|
| c21.. | ADRENALINE [RESP]                              |
| c22.. | EPHEDRINE HYDROCHLORIDE [RESPIRATORY USE]      |
| c23.. | *ISOETHARINE HYDROCHLORIDE                     |
| c24.. | ISOPRENALINE SULFATE                           |
| c25.. | ORCIPRENALINE SULFATE [RESPIRATORY USE]        |
| c3... | ANTICHOLINERGIC BRONCHODILATORS                |
| c31.. | IPRATROPIUM BROMIDE [1]                        |
| c32.. | OXITROPIUM BROMIDE                             |
| c33.. | TIOTROPIUM                                     |
| c34.. | ACLIDINIUM                                     |
| c35.. | UMECLIDIUM                                     |
| c4... | XANTHINE BRONCHODILATORS                       |
| c41.. | AMINOPHYLLINE                                  |
| c42.. | CHOLINE THEOPHYLLINATE                         |
| c43.. | THEOPHYLLINE                                   |
| c44.. | CAFFEINE                                       |
| c5... | COMPOUND BRONCHODILATORS                       |
| c51.. | COMPOUND BRONCHODILATORS A-Z                   |
| c52.. | *BRONCHODILATORS + SEDATIVE                    |
| c53.. | COMPOUND BRONCHODILATORS [1]                   |
| c6... | CORTICOSTEROIDS [RESPIRATORY USE]              |
| c61.. | BECLOMETASONE DIPROPIONATE [RESPIRATORY USE]   |
| c62.. | BECLOMETASONE COMPOUNDS                        |
| c63.. | *BETAMETHASONE VALERATE                        |
| c64.. | BUDESONIDE [RESPIRATORY USE]                   |
| c65.. | FLUTICASONE PROPIONATE [RESPIRATORY USE]       |
| c66.. | BECLOMETASONE DIPROPIONATE [RESPIRATORY USE 2] |
| c67.. | BUDESONIDE+FORMOTEROL                          |
| c68.. | MOMETASONE [RESPIRATORY USE]                   |
| c69.. | CICLESONIDE                                    |
| c6A.. | BECLOMETASONE+FORMOTEROL                       |
| c6B.. | FLUTICASONE+VILANTEROL                         |
| c7... | ASTHMA PROPHYLAXIS                             |
| c71.. | SODIUM CROMOGLICATE [ASTHMA]                   |
| c72.. | SODIUM CROMOGLICATE COMPOUNDS                  |
| c73.. | KETOTIFEN [ASTHMA PROPHYLAXIS]                 |
| c74.. | NEDOCROMIL SODIUM [ASTHMA]                     |
| c8... | ANTIHISTAMINES                                 |
| c81.. | ASTEMIZOLE                                     |
| c82.. | AZATADINE MALEATE                              |
| c83.. | BROMPHENIRAMINE MALEATE                        |
| c84.. | CHLORPHENAMINE MALEATE                         |
| c85.. | CLEMASTINE                                     |
| c86.. | CYPROHEPTADINE HYDROCHLORIDE                   |
| c87.. | DIMETHINDENE MALEATE                           |

|       |                                               |
|-------|-----------------------------------------------|
| c88.. | DIPHENHYDRAMINE HYDROCHLORIDE [ANTIHISTAMINE] |
| c89.. | DIPHENYLPYRALINE HYDROCHLORIDE                |
| c8a.. | HYDROXYZINE HYDROCHLORIDE [ANTIHISTAMINE]     |
| c8b.. | KETOTIFEN [ANTIHISTAMINE]                     |
| c8c.. | MEBHYDROLIN                                   |
| c8d.. | MEPYRAMINE MALEATE [ANTIHISTAMINE]            |
| c8e.. | MEQUITAZINE                                   |
| c8f.. | OXATOMIDE                                     |
| c8g.. | PHENINDAMINE TARTRATE                         |
| c8h.. | PHENIRAMINE MALEATE                           |
| c8i.. | PROMETHAZINE HYDROCHLORIDE [ANTIHISTAMINE]    |
| c8j.. | TERFENADINE                                   |
| c8k.. | ALIMEMAZINE TARTRATE [ANTIHISTAMINE]          |
| c8l.. | TRIPROLIDINE HYDROCHLORIDE                    |
| c8m.. | ACRIVASTINE                                   |
| c8n.. | CETIRIZINE DIHYDROCHLORIDE                    |
| c8o.. | LORATADINE                                    |
| c8p.. | FEXOFENADINE                                  |
| c8q.. | MIZOLASTINE                                   |
| c8r.. | DESLORATADINE                                 |
| c8s.. | LEVOCETIRIZINE                                |
| c8t.. | EPINASTINE                                    |
| c8u.. | RUPATADINE                                    |
| c8v.. | BILASTINE                                     |
| c9... | HYPOSENSITISATION                             |
| c91.. | POLLEN ALLERGY PREPARATIONS                   |
| c92.. | HOUSE DUST MITE ALLERGY PREPS.                |
| c93.. | *SPECIFIC ALLERGY PREPARATIONS                |
| c94.. | WASP/BEE VENOM ALLERGY PREPARATIONS           |
| c95.. | ALLERGY TESTING PREPARATIONS                  |
| ca... | ALLERGIC EMERGENCIES [NO DRUGS HERE]          |
| cA... | LEUKOTRIENE RECEPTOR ANTAGONIST               |
| cA1.. | MONTELUKAST                                   |
| cA2.. | ZAFIRLUKAST                                   |
| cb... | RESPIRATORY STIMULANTS + SURFACTANTS          |
| cb1.. | DOXAPRAM HYDROCHLORIDE [RESPIRATORY USE]      |
| cb2.. | NIKETHAMIDE                                   |
| cb3.. | ETHAMIVAN                                     |
| cb4.. | COLFOSCERIL PALMITATE                         |
| cb5.. | BERACTANT                                     |
| cb6.. | PHOSPHOLIPID FRACTION                         |
| cb7.. | PUMACTANT                                     |
| cc... | OXYGEN                                        |
| cd... | INHALATIONAL MUCOLYTICS                       |
| cd1.. | *TYLOXAPOL                                    |

|       |                                                  |
|-------|--------------------------------------------------|
| cd2.. | DORNASE ALFA                                     |
| ce... | ORAL/PARENTERAL MUCOLYTICS                       |
| ce1.. | ACETYLCYSTEINE [RESPIRATORY USE]                 |
| ce2.. | *BROMHEXINE HYDROCHLORIDE                        |
| ce3.. | CARBOCISTEINE                                    |
| ce4.. | MECYSTEINE HYDROCHLORIDE                         |
| ce5.. | ERDOSTEINE                                       |
| cf... | INHALATIONS                                      |
| cf1.. | INHALATIONS A-Z                                  |
| cg... | COUGH SUPPRESSANTS                               |
| cg1.. | CODEINE PHOSPHATE                                |
| cg2.. | DEXTROMETHORPHAN HYDROBROMIDE                    |
| cg3.. | DIAMORPHINE HCL [COUGH]                          |
| cg4.. | ISOAMINILE CITRATE                               |
| cg5.. | METHADONE HCL [COUGH]                            |
| cg6.. | NOSCAPINE                                        |
| cg7.. | PHOLCODINE                                       |
| ch... | EXPECTORANTS/COUGH COMPOUNDS                     |
| ch1.. | GENERIC EXPECTORANTS/COUGH COMPOUND PREPARATIONS |
| ch2.. | PROPRIETARY COUGH COMPOUND PREPARATIONS A-L      |
| ch3.. | PROPRIETARY COUGH COMPOUND PREPARATIONS M-Z      |
| ci... | SYSTEMIC NASAL DECONGESTANTS                     |
| ci1.. | EPHEDRINE SYSTEMIC DECONGESTANTS                 |
| cj... | AMINOGLYCOSIDES [RESPIRATORY USE]                |
| cj1.. | TOBRAMYCIN [RESPIRATORY USE]                     |
| ck... | MONOCLONAL IgE ANTIBODY                          |
| ck1.. | OMALIZUMAB                                       |
| cl... | PDE4 INHIBITORS                                  |
| cl1.. | ROFLUMILAST                                      |
| cm... | CFTR SELECTIVE POTENTIATOR                       |
| cm1.. | IVACAFTOR                                        |
| d.... | CENTRAL NERVOUS SYSTEM DRUGS                     |
| d1... | HYPNOTICS                                        |
| d11.. | CHLORAL HYDRATE                                  |
| d12.. | CLOMETHIAZOLE EDISYLATE [HYPNOTIC]               |
| d13.. | *DICHLORALPHENAZONE                              |
| d14.. | *FLUNITRAZEPAM                                   |
| d15.. | FLURAZEPAM                                       |
| d16.. | LOPRAZOLAM                                       |
| d17.. | LORMETAZEPAM                                     |
| d18.. | NITRAZEPAM                                       |
| d19.. | PROMETHAZINE HCL [HYPNOTIC] see section c8i..    |
| d1a.. | TEMAZEPAM [HYPNOTIC]                             |
| d1b.. | *TRIAZOLAM                                       |
| d1c.. | TRICLOFOS SODIUM                                 |

|       |                                           |
|-------|-------------------------------------------|
| d1d.. | ZOPICLONE                                 |
| d1e.. | *GLUTETHIMIDE [no drugs here]             |
| d1f.. | ZOLPIDEM                                  |
| d1g.. | ZALEPLON                                  |
| d1h.. | MELATONIN                                 |
| d1i.. | DEXMEDETOMIDINE                           |
| d2... | ANXIOLYTICS                               |
| d21.. | DIAZEPAM [ANXIOLYTIC]                     |
| d22.. | ALPRAZOLAM                                |
| d23.. | BROMAZEPAM                                |
| d24.. | CHLORDIAZEPOXIDE                          |
| d25.. | CHLORMEZANONE                             |
| d26.. | CLOBAZAM                                  |
| d27.. | CLORAZEPATE DIPOTASSIUM                   |
| d28.. | HYDROXYZINE HCL [ANXIOLYTIC]              |
| d29.. | *KETAZOLAM                                |
| d2a.. | LORAZEPAM [ANXIOLYTIC]                    |
| d2b.. | *MEDAZEPAM                                |
| d2c.. | MEPROBAMATE                               |
| d2d.. | OXAZEPAM                                  |
| d2e.. | *PRAZEPAM                                 |
| d2f.. | BUSPIRONE HYDROCHLORIDE                   |
| d2g.. | FLUMAZENIL                                |
| d3... | BARBITURATES/METHYPRYLONE                 |
| d31.. | BARBITURATES                              |
| d32.. | *METHYPRYLONE                             |
| d4... | ANTIPSYCHOTIC DRUGS                       |
| d41.. | CHLORPROMAZINE HYDROCHLORIDE              |
| d42.. | BENPERIDOL                                |
| d43.. | *CHLORPROTHIXENE                          |
| d44.. | DROPERIDOL [CENTRAL NERVOUS SYSTEM USE]   |
| d45.. | FLUPENTIXOL [ANTIPSYCHOTIC]               |
| d46.. | FLUPHENAZINE HYDROCHLORIDE                |
| d47.. | HALOPERIDOL [ANTIPSYCHOTIC]               |
| d48.. | LEVOMEPRMAZINE                            |
| d49.. | OXYPERTINE                                |
| d4a.. | PERICYAZINE                               |
| d4b.. | PERPHENAZINE [CENTRAL NERVOUS SYSTEM USE] |
| d4c.. | PIMOZIDE                                  |
| d4d.. | PROCHLORPERAZINE [antipsych] [see dhe..]  |
| d4e.. | PROMAZINE HYDROCHLORIDE                   |
| d4f.. | SULPIRIDE                                 |
| d4g.. | THIORIDAZINE                              |
| d4h.. | TRIFLUOPERAZINE [ANTIPSYCHOTIC]           |
| d4i.. | TRIFLUPERIDOL                             |



|       |                                              |
|-------|----------------------------------------------|
| d4j.. | ZUCLOPENTHIXOL DIHYDROCHLORIDE               |
| d4k.. | LOXAPINE SUCCINATE                           |
| d4l.. | CLOZAPINE                                    |
| d4m.. | REMOXIPRIDE                                  |
| d4n.. | ZUCLOPENTHIXOL ACETATE                       |
| d4p.. | RISPERIDONE                                  |
| d4q.. | SERTINDOLE                                   |
| d4r.. | OLANZAPINE                                   |
| d4s.. | QUETIAPINE                                   |
| d4t.. | AMISULPRIDE                                  |
| d4u.. | ZOTEPINE                                     |
| d4v.. | ARIPIPRAZOLE                                 |
| d4w.. | PALIPERIDONE                                 |
| d4x.. | ASENAPINE                                    |
| d4y.. | LURASIDONE                                   |
| d5... | ANTIPSYCHOTIC DEPOT INJECTIONS               |
| d51.. | FLUPENTIXOL DECANOATE                        |
| d52.. | FLUPHENAZINE DECANOATE                       |
| d53.. | *FLUPHENAZINE ENANTHATE                      |
| d54.. | FLUSPIRILENE                                 |
| d55.. | HALOPERIDOL DECANOATE                        |
| d56.. | PIPOTIAZINE PALMITATE                        |
| d57.. | ZUCLOPENTHIXOL DECANOATE                     |
| d58.. | OLANZAPINE PAMOATE                           |
| d6... | LITHIUM SALTS                                |
| d61.. | LITHIUM CARBONATE                            |
| d62.. | LITHIUM CITRATE                              |
| d7... | TRICYCLIC ANTIDEPRESSANTS                    |
| d71.. | AMITRIPTYLINE HYDROCHLORIDE [ANTIDEPRESSANT] |
| d72.. | *BUTRIPTYLINE                                |
| d73.. | CLOMIPRAMINE HYDROCHLORIDE                   |
| d74.. | DESIPRAMINE HYDROCHLORIDE                    |
| d75.. | DOSULEPIN HYDROCHLORIDE                      |
| d76.. | DOXEPIN                                      |
| d77.. | IMIPRAMINE HYDROCHLORIDE [ANTIDEPRESSANT]    |
| d78.. | IPRINDOLE                                    |
| d79.. | LOFEPRAMINE                                  |
| d7a.. | MAPROTILINE HYDROCHLORIDE                    |
| d7b.. | MIANSERIN HYDROCHLORIDE                      |
| d7c.. | NORTRIPTYLINE                                |
| d7d.. | PROTRIPTYLINE HYDROCHLORIDE                  |
| d7e.. | TRAZODONE HYDROCHLORIDE                      |
| d7f.. | TRIMIPRAMINE                                 |
| d7g.. | VILOXAZINE HYDROCHLORIDE                     |
| d7h.. | AMOXAPINE                                    |

|       |                                                          |
|-------|----------------------------------------------------------|
| d8... | MONOAMINE-OXIDASE INHIBITORS                             |
| d81.. | PHENELZINE                                               |
| d82.. | *IPRONIAZID                                              |
| d83.. | ISOCARBOXAZID                                            |
| d84.. | TRANLYCYPROMINE                                          |
| d85.. | MOCLOBEMIDE                                              |
| d9... | COMPOUND ANTIDEPRESSANT DRUGS                            |
| d91.. | COMPOUND ANTIDEPRESSANTS A-Z                             |
| da... | OTHER ANTIDEPRESSANT DRUGS                               |
| dA... | OTHER DRUGS USED FOR THE TREATMENT OF MULTIPLE SCLEROSIS |
| da1.. | FLUPENTIXOL [ANTIDEPRESSANT]                             |
| dA1.. | GLATIRAMER                                               |
| da2.. | TRYPTOPHAN                                               |
| dA2.. | CANNABINOIDS                                             |
| da3.. | FLUVOXAMINE MALEATE                                      |
| dA3.. | FAMPRIDINE                                               |
| da4.. | FLUOXETINE HYDROCHLORIDE                                 |
| dA4.. | TERIFLUNOMIDE                                            |
| da5.. | SERTRALINE HYDROCHLORIDE                                 |
| dA5.. | DIMETHYL FUMARATE                                        |
| da6.. | PAROXETINE HYDROCHLORIDE                                 |
| da7.. | VENLAFAXINE                                              |
| da8.. | NEFAZODONE                                               |
| da9.. | CITALOPRAM                                               |
| daA.. | REBOXETINE                                               |
| daB.. | MIRTAZAPINE                                              |
| daC.. | ESCITALOPRAM                                             |
| daD.. | AGOMELATINE                                              |
| daE.. | VORTIOXETINE                                             |
| db... | WEAK CENTRAL NERVOUS SYSTEM STIMULANTS                   |
| dB... | OTHER ANTIDEMENTIA DRUGS                                 |
| db1.. | *PEMOLINE                                                |
| dB1.. | MEMANTINE HYDROCHLORIDE                                  |
| db2.. | WEAK CENTRAL NERVOUS SYSTEM STIMULANT + VITAMINS         |
| dc... | AMFETAMINE AND COCAINE                                   |
| dC... | OTHER DRUGS USED FOR THE TREATMENT OF NARCOLEPSY         |
| dc1.. | DEXAMFETAMINE SULFATE                                    |
| dC1.. | SODIUM OXYBATE                                           |
| dc2.. | *COCAINE [NO DRUGS HERE]                                 |
| dD... | OTHER CENTRAL NERVOUS SYSTEM DRUGS                       |
| dD1.. | TAFAMIDIS                                                |
| de... | BULK-FORMING DRUGS [APPETITE SUPPRESSANTS]               |
| de1.. | METHYLCELLULOSE [APPETITE SUPPRESSANTS]                  |
| de2.. | STERCULIA [APPETITE SUPPRESSANT]                         |
| df... | CENTRAL APPETITE SUPPRESSANTS                            |

|       |                                                    |
|-------|----------------------------------------------------|
| df1.. | DIETHYLPROPION HYDROCHLORIDE                       |
| df2.. | FENFLURAMINE HYDROCHLORIDE                         |
| df3.. | MAZINDOL                                           |
| df4.. | PHENTERMINE                                        |
| df5.. | DEXFENFLURAMINE                                    |
| df6.. | SIBUTRAMINE                                        |
| df7.. | RIMONABANT                                         |
| dh... | NAUSEA AND VERTIGO DRUGS                           |
| dh1.. | BETAHISTINE HYDROCHLORIDE                          |
| dh2.. | CHLORPROMAZINE HCL [NAUSEA] [see dh2..]            |
| dh3.. | CINNARIZINE [NAUSEA]                               |
| dh4.. | CYCLIZINE                                          |
| dh5.. | DIMENHYDRINATE                                     |
| dh6.. | DIPHENHYDRAMINE HYDROCHLORIDE [NAUSEA]             |
| dh7.. | DOMPERIDONE (NAUSEA)                               |
| dh8.. | HYOSCINE HYDROBROMIDE [CENTRAL NERVOUS SYSTEM USE] |
| dh9.. | MECLOZINE HYDROCHLORIDE                            |
| dha.. | *MEPYRAMINE MALEATE [NAUSEA]                       |
| dhb.. | METOCLOPRAMIDE HYDROCHLORIDE                       |
| dhc.. | NABILONE                                           |
| dhd.. | *PERPHENAZINE [NO DRUGS HERE]                      |
| dhe.. | PROCHLORPERAZINE [NAUSEA]                          |
| dhf.. | PROMETHAZINE [nausea] [see c8i..]                  |
| dhg.. | PROMETHAZINE THEOCLATE                             |
| dhh.. | *THIETHYLPERAZINE                                  |
| dhi.. | TRIFLUOPERAZINE [NAUSEA] [see dh4..]               |
| dhj.. | *CISAPRIDE                                         |
| dhk.. | ONDANSETRON                                        |
| dhl.. | GRANISETRON HYDROCHLORIDE                          |
| dhm.. | TROPISETRON HYDROCHLORIDE                          |
| dho.. | DOLASETRON                                         |
| dhp.. | APREPITANT                                         |
| dhq.. | PALONOSETRON                                       |
| dhr.. | CINNARIZINE+DIMENHYDRINATE                         |
| dhs.. | FOSAPREPITANT                                      |
| dht.. | NETUPITANT+PALONOSETRON                            |
| di... | NON-NARCOTIC ANALGESICS                            |
| di1.. | ASPIRIN [CENTRAL NERVOUS SYSTEM USE]               |
| di2.. | PARACETAMOL                                        |
| di3.. | BENORILATE [CENTRAL NERVOUS SYSTEM]                |
| di4.. | DIFLUNISAL [CNS analgesic] [seej23..]              |
| di5.. | *FENOPROFEN [ANALGESIC]                            |
| di6.. | IBUPROFEN [CNS analgesic] [see j28..]              |
| di7.. | MEFENAMIC ACID [CNS ANALGESIC] [see j2b..]         |
| di8.. | NAPROXEN SODIUM                                    |

|       |                                                       |
|-------|-------------------------------------------------------|
| di9.. | NEFOPAM HYDROCHLORIDE                                 |
| dia.. | COMPOUND ANALGESICS A-L                               |
| dib.. | COMPOUND ANALGESICS M-Z                               |
| dic.. | COMPOUND ANALGESICS[1]                                |
| did.. | PARACETAMOL PRODUCTS[2]                               |
| die.. | ZICONOTIDE                                            |
| dj... | NARCOTIC ANALGESICS                                   |
| dj1.. | MORPHINE SALTS(1) [CENTRAL NERVOUS SYSTEM USE]        |
| dj2.. | MORPHINE ANALGESIC ELIXIRS                            |
| dj3.. | BUPRENORPHINE                                         |
| dj4.. | CODEINE PHOSPHATE [ANALGESIC]                         |
| dj5.. | DEXTROMORAMIDE                                        |
| dj6.. | DEXTROPROPOXYPHENE HYDROCHLORIDE                      |
| dj7.. | DIAMORPHINE HCL [ANALGESIC]                           |
| dj8.. | DIHYDROCODEINE TARTRATE                               |
| dj9.. | DIPIPANONE HYDROCHLORIDE                              |
| dja.. | LEVORPHANOL TARTRATE [CENTRAL NERVOUS SYSTEM USE]     |
| djA.. | TRAMADOL (2)                                          |
| djb.. | MEPTAZINOL [ANALGESIC]                                |
| djB.. | TAPENTADOL                                            |
| djc.. | METHADONE HCL [ANALGESIC]                             |
| djd.. | NALBUPHINE HYDROCHLORIDE [CENTRAL NERVOUS SYSTEM USE] |
| dje.. | *PAPAVERETUM [CNS NARCOTIC]                           |
| djf.. | PENTAZOCINE                                           |
| djg.. | PETHIDINE HYDROCHLOR [ANALGESIC]                      |
| djh.. | PHENAZOCINE HYDROBROMIDE                              |
| dji.. | TRAMADOL                                              |
| djj.. | HYDROMORPHONE HYDROCHLORIDE                           |
| djk.. | OXYCODONE HYDROCHLORIDE                               |
| djl.. | LEVACETYLMETHADOL HYDROCHLORIDE                       |
| djm.. | OXYCODONE HYDROCHLORIDE (2)                           |
| djy.. | MORPHINE SALTS(3) [CENTRAL NERVOUS SYSTEM USE]        |
| djz.. | MORPHINE SALTS(2) [CENTRAL NERVOUS SYSTEM USE]        |
| dk... | TRIGEMINAL NEURALGIA [no drugs here]                  |
| dl... | ACUTE MIGRAINE TREATMENT                              |
| dl1.. | ANALGESICS WITH ANTI-EMETICS                          |
| dl2.. | ERGOTAMINE TARTRATE                                   |
| dl3.. | *DIHYDROERGOTAMINE MESYLATE                           |
| dl4.. | ISOMETHEPTENE MUCATE                                  |
| dl5.. | SUMATRIPTAN SUCCINATE                                 |
| dl6.. | TOLFENAMIC ACID                                       |
| dl7.. | SUMATRIPTAN                                           |
| dl8.. | ZOLMITRIPTAN                                          |
| dl9.. | NARATRIPTAN                                           |
| dlA.. | RIZATRIPTAN                                           |

|       |                                                      |
|-------|------------------------------------------------------|
| dIB.. | DIHYDROERGOTAMINE                                    |
| dIC.. | ALMOTRIPTAN                                          |
| dID.. | ELETRIPTAN                                           |
| dIE.. | FROVATRIPTAN                                         |
| dm... | PROPHYLAXIS OF MIGRAINE                              |
| dm1.. | CLONIDINE HCL [MIGRAINE]                             |
| dm2.. | METHYSERGIDE                                         |
| dm3.. | PIZOTIFEN                                            |
| dn... | CONTROL OF EPILEPSY                                  |
| dn1.. | ACETAZOLAMIDE [EPILEPSY]                             |
| dn2.. | *BECLAMIDE                                           |
| dn3.. | CARBAMAZEPINE                                        |
| dn4.. | CLONAZEPAM [EPILEPSY CONTROL]                        |
| dn5.. | ETHOSUXIMIDE                                         |
| dn6.. | METHYLPHENOBARBITAL                                  |
| dn7.. | PHENOBARBITAL                                        |
| dn8.. | PHENYTOIN                                            |
| dn9.. | PHENYTOIN SODIUM                                     |
| dna.. | PRIMIDONE                                            |
| dnb.. | SODIUM VALPROATE                                     |
| dnc.. | CLOBAZAM [EPILEPSY ONLY]                             |
| dne.. | VIGABATRIN                                           |
| dnf.. | LAMOTRIGINE                                          |
| dng.. | PIRACETAM                                            |
| dnh.. | VALPROIC ACID                                        |
| dni.. | FOSPHENYTOIN SODIUM                                  |
| dnj.. | GABAPENTIN                                           |
| dnk.. | TOPIRAMATE                                           |
| dnl.. | TIAGABINE                                            |
| dnm.. | OXCARBAZEPINE                                        |
| dno.. | LEVETIRACETAM                                        |
| dnp.. | PREGABALIN                                           |
| dnq.. | ZONISAMIDE                                           |
| dnr.. | RUFINAMIDE                                           |
| dns.. | STIRIPENTOL                                          |
| dnt.. | LACOSAMIDE                                           |
| dnu.. | ESLICARBAZEPINE                                      |
| dnv.. | RETIGABINE                                           |
| dnw.. | PERAMPANEL                                           |
| do... | STATUS EPILEPTICUS DRUGS                             |
| do1.. | DIAZEPAM [EPILEPSY USE]                              |
| do2.. | CLONAZEPAM [STATUS EPILEPSY]                         |
| do3.. | CLOMETHIAZOLE EDISYLATE [CENTRAL NERVOUS SYSTEM USE] |
| do4.. | LORAZEPAM [EPILEPSY]                                 |
| do5.. | PARALDEHYDE                                          |

|       |                                                      |
|-------|------------------------------------------------------|
| do6.. | PHENYTOIN SODIUM [STATUS EPILEPSY]                   |
| dp... | FEBRILE CONVULSIONS                                  |
| dq... | PARKINSONISM-DOPAMINERGIC DRUG                       |
| dq1.. | LEVODOPA                                             |
| dq2.. | LEVODOPA WITH BENSERAZIDE                            |
| dq3.. | LEVODOPA WITH CARBIDOPA                              |
| dq4.. | AMANTADINE HYDROCHLORIDE [PARKINSONS]                |
| dq5.. | BROMOCRIPTINE [PARKINSONS]                           |
| dq6.. | SELEGILINE                                           |
| dq7.. | LISURIDE MALEATE                                     |
| dq8.. | PERGOLIDE MESYLATE                                   |
| dq9.. | APOMORPHINE HYDROCHLORIDE                            |
| dqA.. | ROPINIROLE HYDROCHLORIDE                             |
| dqB.. | CABERGOLINE [PARKINSONS]                             |
| dqC.. | TOLCAPONE                                            |
| dqD.. | ENTACAPONE                                           |
| dqE.. | PRAMIPEXOLE                                          |
| dqF.. | RASAGILINE                                           |
| dqG.. | ROTIGOTINE                                           |
| dr... | PARKINSONISM-ANTICHOLINERGICS                        |
| dr1.. | TRIHENXYPHENIDYL HYDROCHLORIDE                       |
| dr2.. | ORPHENADRINE HYDROCHLORIDE                           |
| dr3.. | BENZATROPINE MESYLATE                                |
| dr4.. | BIPERIDEN                                            |
| dr5.. | METHIXENE HYDROCHLORIDE                              |
| dr6.. | PROCYCLIDINE HYDROCHLORIDE                           |
| ds... | ESSENTIAL TREMOR,CHOREA,TICS                         |
| ds1.. | HALOPERIDOL [TICS, CHOREA] [see d47..]               |
| ds2.. | TETRABENAZINE                                        |
| ds3.. | CLOSTRIDIUM BOTULINUM A TOXIN-HAEMAGGLUTININ COMPLEX |
| ds4.. | CLOSTRIDIUM BOTULINUM B TOXIN                        |
| dt... | CEREBRAL VESSEL SPASMOLYTIC                          |
| dt1.. | NIMODIPINE                                           |
| du... | ALCOHOL/DRUG DEPENDENCY DRUGS                        |
| du1.. | DISULFIRAM                                           |
| du2.. | NALTREXONE HYDROCHLORIDE                             |
| du3.. | NICOTINE                                             |
| du4.. | LOFEXIDINE HYDROCHLORIDE                             |
| du5.. | ACAMPROSATE CALCIUM                                  |
| du6.. | BUPROPION                                            |
| du7.. | NICOTINE 2                                           |
| du8.. | VARENICLINE                                          |
| du9.. | NICOTINE WITHDRAWAL PRODUCTS                         |
| duA.. | NALMEFENE                                            |
| duB.. | NICOTINE 3                                           |

|       |                                                       |
|-------|-------------------------------------------------------|
| dv... | PARACETAMOL POISONING                                 |
| dv1.. | ACETYLCYSTEINE [PARACETAMOL POISONING TREATMENT]      |
| dv2.. | METHIONINE                                            |
| dw... | DRUGS USED TO TREAT HYPERACTIVITY DISORDERS           |
| dw1.. | METHYLPHENIDATE                                       |
| dw2.. | ATOMOXETINE                                           |
| dw3.. | LISDEXAMFETAMINE                                      |
| dx... | DRUGS USED FOR THE TREATMENT OF MOTOR NEURONE DISEASE |
| dx1.. | RILUZOLE                                              |
| dy... | CENTRAL ACETYLCHOLINESTERASE INHIBITOR                |
| dy1.. | DONEPEZIL HYDROCHLORIDE                               |
| dy2.. | RIVASTIGMINE                                          |
| dy3.. | GALANTAMINE                                           |
| dz... | OTHER CENTRAL NERVOUS SYSTEM STIMULANTS               |
| dz1.. | MODAFINIL                                             |
| e.... | DRUGS USED IN INFECTIONS                              |
| e1... | PENICILLINASE SENS PENICILLINS                        |
| e11.. | BENZYL PENICILLIN (PENICILLIN G)                      |
| e12.. | *BENETHAMINE PENICILLIN                               |
| e13.. | *BENZATHINE PENICILLIN                                |
| e14.. | *PHENETHICILLIN                                       |
| e15.. | PHENOXYMETHYLPENICILLIN                               |
| e16.. | PROCAINE PENICILLIN                                   |
| e2... | PENICILLINASE-RESISTANT PENICILLINS                   |
| e21.. | CLOXACILLIN                                           |
| e22.. | FLUCLOXACILLIN                                        |
| e23.. | METHICILLIN SODIUM                                    |
| e24.. | TEMOCILLIN                                            |
| e3... | BROAD SPECTRUM PENICILLINS                            |
| e31.. | AMOXICILLIN                                           |
| e32.. | AMPICILLIN                                            |
| e33.. | AMPICILLIN + PENICILLINASE-RESISTANT PENICILLIN       |
| e34.. | BACAMPICILLIN HYDROCHLORIDE                           |
| e35.. | *CICLACILLIN                                          |
| e36.. | *MEZLOCILLIN                                          |
| e37.. | PIPERACILLIN                                          |
| e38.. | PIVAMPICILLIN                                         |
| e39.. | TALAMPICILLIN HYDROCHLORIDE                           |
| e3A.. | AMOXICILLIN [2]                                       |
| e3z.. | AMOXICILLIN [GENERIC ADDITIONS]                       |
| e4... | ANTIPSEUDOMONAL PENICILLINS                           |
| e41.. | AZLOCILLIN                                            |
| e42.. | CARBENICILLIN                                         |
| e43.. | CARFECILLIN SODIUM                                    |
| e44.. | TICARCILLIN                                           |

|       |                                            |
|-------|--------------------------------------------|
| e5... | OTHER PENICILLINS                          |
| e51.. | MECILLINAM                                 |
| e52.. | PIVMECILLINAM HYDROCHLORIDE                |
| e6... | CEPHALOSPORINS & CEPHAMYCINS               |
| e61.. | CEFACTOR                                   |
| e62.. | CEFADROXIL                                 |
| e63.. | CEFOTAXIME                                 |
| e64.. | CEFOXITIN                                  |
| e65.. | *CEFSULODIN SODIUM                         |
| e66.. | CEFTAZIDIME                                |
| e67.. | CEFTIZOXIME                                |
| e68.. | CEFUROXIME                                 |
| e69.. | CEFALEXIN                                  |
| e6a.. | *CEPHALOTHIN                               |
| e6b.. | CEFAMANDOLE                                |
| e6c.. | CEFAZOLIN                                  |
| e6d.. | CEFRADINE                                  |
| e6e.. | *LATAMOXEF DISODIUM                        |
| e6f.. | AZTREONAM                                  |
| e6g.. | IMPENEM+CILASTATIN                         |
| e6h.. | CEFIXIME                                   |
| e6j.. | CEFODIZIME                                 |
| e6k.. | CEFPODOXIME PROXETIL                       |
| e6m.. | CEFTRIAZONE                                |
| e6n.. | CEFTIBUTEN                                 |
| e6o.. | CEFPIROME                                  |
| e6p.. | CEFPROZIL                                  |
| e6q.. | CEFTAROLINE FOSAMIL                        |
| e6r.. | CEFTOBIPROLE                               |
| e7... | TETRACYCLINES [SYSTEMIC]                   |
| e71.. | TETRACYCLINE [SYSTEMIC]                    |
| e72.. | CHLORTETRACYCLINE HYDROCHLORIDE [SYSTEMIC] |
| e73.. | *CLOMOCYCLINE SODIUM                       |
| e74.. | DEMECLOCYCLINE HYDROCHLORIDE               |
| e75.. | DOXYCYCLINE                                |
| e76.. | LYMECYCLINE                                |
| e77.. | MINOCYCLINE                                |
| e78.. | OXYTETRACYCLINE                            |
| e79.. | COMPOUND TETRACYCLINE PREPARATIONS         |
| e8... | AMINOGLYCOSIDES                            |
| e81.. | GENTAMICIN [INFECTIONS]                    |
| e82.. | AMIKACIN                                   |
| e83.. | FRAMYCETIN SULFATE [SYSTEMIC]              |
| e84.. | KANAMYCIN                                  |
| e85.. | NEOMYCIN SULFATE [SYSTEMIC]                |



|       |                                    |
|-------|------------------------------------|
| e86.. | NETILMICIN                         |
| e87.. | TOBRAMYCIN [SYSTEMIC]              |
| e9... | MACROLIDES                         |
| e91.. | ERYTHROMYCIN                       |
| e92.. | CLARITHROMYCIN                     |
| e93.. | AZITHROMYCIN DIHYDRATE             |
| e94.. | SPIRAMYCIN                         |
| e95.. | ERYTHROMYCIN [2]                   |
| e96.. | TELITHROMYCIN                      |
| ea... | CLINDAMYCIN AND LINCOMYCIN         |
| ea1.. | CLINDAMYCIN                        |
| ea2.. | *LINCOMYCIN                        |
| eb... | OTHER ANTIBIOTICS                  |
| eb1.. | ACROSOXACIN                        |
| eb2.. | CHLORAMPHENICOL [SYSTEMIC]         |
| eb3.. | COLISTIN                           |
| eb4.. | SODIUM FUSIDATE                    |
| eb5.. | POLYMYXIN B SULF [SYSTEMIC]        |
| eb6.. | SPECTINOMYCIN                      |
| eb7.. | VANCOMYCIN                         |
| eb8.. | TEICOPLANIN                        |
| eb9.. | MEROPENEM                          |
| ebA.. | QUINUPRISTIN+DALFOPRISTIN          |
| ebB.. | LINEZOLID                          |
| ebC.. | ERTAPENEM                          |
| ebD.. | DAPTOMYCIN                         |
| ebE.. | TIGECYCLINE                        |
| ebF.. | DORIPENEM                          |
| ebG.. | RIFAXIMIN                          |
| ebH.. | FIDAXOMICIN                        |
| ebI.. | FOSFOMYCIN                         |
| ebJ.. | TELAVANCIN                         |
| ebK.. | TEDIZOLID                          |
| ec... | SULFONAMIDES & TRIMETHOPRIM        |
| ec1.. | CO-TRIMOXAZOLE [GENERIC ADDITIONS] |
| ec2.. | CO-TRIMOXAZOLE - (PROPRIETARY)     |
| ec3.. | *CALCIUM SULPHALOXATE              |
| ec4.. | *PHTHALYLSULPHATHIAZOLE            |
| ec5.. | SULFAMETOPYRAZINE                  |
| ec6.. | SULFADIAZINE                       |
| ec7.. | *SULPHADIMETHOXINE                 |
| ec8.. | SULFADIMIDINE                      |
| ec9.. | *SULPHAFURAZOLE                    |
| eca.. | SULFAGUANIDINE                     |
| ecb.. | *SULPHAUREA                        |

|       |                               |
|-------|-------------------------------|
| ecc.. | TRIMETHOPRIM                  |
| ed... | ANTITUBERCULOUS DRUGS         |
| ed1.. | CAPREOMYCIN                   |
| ed2.. | CYCLOSERINE                   |
| ed3.. | ETHAMBUTOL HYDROCHLORIDE      |
| ed4.. | ISONIAZID                     |
| ed5.. | PYRAZINAMIDE                  |
| ed6.. | RIFAMPICIN                    |
| ed7.. | STREPTOMYCIN                  |
| ed8.. | RIFABUTIN                     |
| ed9.. | BEDAQUILINE                   |
| edA.. | DELAMANID                     |
| edB.. | PARA-AMINOSALICYLIC ACID      |
| ee... | ANTILEPTIC DRUGS              |
| ee1.. | DAPSONE                       |
| ee2.. | *CLOFAZIMINE                  |
| ef... | METRONIDAZOLE & TINIDAZOLE    |
| ef1.. | METRONIDAZOLE                 |
| ef2.. | TINIDAZOLE                    |
| eg... | URINARY ANTIMICROBIAL DRUGS   |
| eg1.. | NITROFURANTOIN                |
| eg2.. | CINOXACIN                     |
| eg3.. | METHENAMINE                   |
| eg4.. | NALIDIXIC ACID                |
| eg5.. | NOXYTIOLIN                    |
| eg6.. | CIPROFLOXACIN                 |
| eg7.. | ENOXACIN                      |
| eg8.. | OFLOXACIN                     |
| eg9.. | NORFLOXACIN                   |
| ega.. | *TEMAFLOXACIN                 |
| egA.. | FOSFOMYCIN TROMETAMOL         |
| egB.. | GREPAFLOXACIN                 |
| egC.. | LEVOFLOXACIN                  |
| egD.. | MOXIFLOXACIN                  |
| eh... | ANTIFUNGAL DRUGS              |
| eh1.. | AMPHOTERICIN [ANTI FUNGAL]    |
| eh2.. | FLUCYTOSINE                   |
| eh3.. | GRISEOFULVIN                  |
| eh4.. | KETOCONAZOLE [INFECTIONS]     |
| eh5.. | MICONAZOLE [SYSTEMIC]         |
| eh6.. | NATAMYCIN [SYSTEMIC]          |
| eh7.. | NYSTATIN [SYSTEMIC]           |
| eh8.. | FLUCONAZOLE                   |
| eh9.. | ITRACONAZOLE                  |
| eha.. | TERBINAFINE HYDROCHLORIDE [1] |

|       |                                       |
|-------|---------------------------------------|
| ehb.. | CASPOFUNGIN                           |
| ehc.. | VORICONAZOLE                          |
| ehd.. | POSACONAZOLE                          |
| ehe.. | ANIDULAFUNGIN                         |
| ehf.. | MICAFUNGIN                            |
| ei... | ANTIVIRAL DRUGS                       |
| ei1.. | ACICLOVIR [SYSTEMIC]                  |
| ei2.. | AMANTADINE HYDROCHLORIDE [ANTI VIRAL] |
| ei3.. | INOSINE PRANOBEX                      |
| ei4.. | *VIDARABINE [SYSTEMIC]                |
| ei5.. | ZIDOVUDINE                            |
| ei6.. | RIBAVIRIN                             |
| ei7.. | GANCICLOVIR                           |
| ei8.. | FOSCARNET                             |
| ei9.. | FAMCICLOVIR                           |
| eia.. | EMTRICITABINE                         |
| eiA.. | DIDANOSINE                            |
| eib.. | ATAZANAVIR                            |
| eiB.. | ZALCITABINE                           |
| eiC.. | FOSAMPRENAVIR                         |
| eiC.. | VALACICLOVIR                          |
| eid.. | ABACAVIR+LAMIVUDINE                   |
| eiD.. | LAMIVUDINE                            |
| eiE.. | EMTRICITABINE+TENOFIVIR               |
| eiE.. | STAVUDINE                             |
| EIF.. | TIPRANAVIR                            |
| eiF.. | RITONAVIR                             |
| eig.. | ENTECAVIR                             |
| eiG.. | SAQUINAVIR                            |
| eih.. | DARUNAVIR                             |
| eiH.. | INDINAVIR                             |
| eii.. | TELBIVUDINE                           |
| eiI.. | CIDOFOVIR                             |
| eiJ.. | MARAVIROC                             |
| eiJ.. | LAMIVUDINE+ZIDOVUDINE                 |
| eik.. | EFAVIRENZ/EMTRICITABINE/TENOFIVIR     |
| eiK.. | NEVIRAPINE                            |
| eiL.. | RALTEGRAVIR                           |
| eiL.. | NELFINAVIR                            |
| eim.. | ETRAVIRINE                            |
| eiM.. | IMIQUIMOD                             |
| ein.. | BOCEPREVIR                            |
| eiN.. | LEDIPASVIR+SOFOBUVIR                  |
| eiO.. | TELAPREVIR                            |
| eiO.. | EFAVIRENZ                             |

|       |                                                 |
|-------|-------------------------------------------------|
| eip.. | RILPIVIRINE                                     |
| eiP.. | ABACAVIR                                        |
| eiq.. | EMTRICITABINE/RILPIVIRINE/TENOFOVIR             |
| eiQ.. | ZANAMIVIR                                       |
| eir.. | ELVITEGRAVIR+COBICISTAT+EMTRICITABINE+TENOFOVIR |
| eiR.. | PALIVIZUMAB                                     |
| eis.. | ELVITEGRAVIR                                    |
| eiS.. | AMPRENAVIR                                      |
| eit.. | DOLUTEGRAVIR                                    |
| eiT.. | ABACAVIR+LAMIVUDINE+ZIDOVUDINE                  |
| eiU.. | SOFOSBUVIR                                      |
| eiU.. | LOPINAVER+RITONAVIR                             |
| eiv.. | COBICISTAT                                      |
| eiV.. | TENOFOVIR                                       |
| eiw.. | DACLATASVIR                                     |
| eiW.. | VALGANCICLOVIR                                  |
| eix.. | SIMEPREVIR                                      |
| eiX.. | OSELTAMIVIR                                     |
| eiY.. | DOLUTEGRAVIR+ABACAVIR+LAMIVUDINE                |
| eiY.. | ADEFOVIR                                        |
| eiz.. | DARUNAVIR+COBICISTAT                            |
| eiZ.. | ENFUVIRTIDE                                     |
| ej... | ANTIMALARIALS                                   |
| ej1.. | *AMODIAQUINE                                    |
| ej2.. | CHLOROQUINE [ANTI-MALARIAL]                     |
| ej3.. | HYDROXYCHLOROQUINE SULFATE [ANTI MALARIAL]      |
| ej4.. | PRIMAQUINE                                      |
| ej5.. | PROGUANIL HYDROCHLORIDE                         |
| ej6.. | PYRIMETHAMINE                                   |
| ej7.. | QUININE                                         |
| ej8.. | MEFLOQUINE HYDROCHLORIDE                        |
| ej9.. | HALOFANTRINE HYDROCHLORIDE                      |
| ejA.. | MEPACRINE HYDROCHLORIDE                         |
| ejB.. | ATOVAQUONE+PROGUANIL HYDROCHLORIDE              |
| ejC.. | PROGUANIL HYDROCHLORIDE+CHLOROQUINE PHOSPHATE   |
| ejD.. | ARTEMETHER+LUMEFANTRINE                         |
| ejE.. | PIPERAQUINE+DIHYDROARTEMISININ                  |
| ek... | AMOEBICIDES                                     |
| ek1.. | DILOXANIDE FUROATE                              |
| el... | TRICHOMONACIDES                                 |
| el1.. | NIMORAZOLE                                      |
| em... | ANTI GIARDIAL DRUGS                             |
| em1.. | *ATEBRINE                                       |
| en... | LEISHMANIACIDES                                 |
| en1.. | SODIUM STIBOGLUCONATE                           |

|       |                                         |
|-------|-----------------------------------------|
| eo... | *TRYPANOCIDES[no drugs here]            |
| ep... | DRUGS FOR TOXOPLASMOSIS [no drugs here] |
| eq... | DRUGS FOR THREADWORMS                   |
| eq1.. | MEBENDAZOLE                             |
| eq2.. | PIPERAZINE                              |
| er... | ANTHELMINTICS - ASCARICIDES             |
| er1.. | PYRANTEL                                |
| es... | ANTHELMINTICS - ANTICESTODALS           |
| es1.. | NICLOSAMIDE                             |
| es2.. | ALBENDAZOLE                             |
| et... | DRUGS FOR HOOKWORMS                     |
| et1.. | BEPHENIUM                               |
| eu... | SCHISTOSOMACIDES[no drugs here]         |
| ev... | *FILARICIDES                            |
| ev1.. | *DIETHYLCARBAMAZINE CITRATE             |
| ew... | DRUGS FOR GUINEA WORMS [no drugs here]  |
| ex... | DRUGS FOR STRONGYLOIDIASIS              |
| ex1.. | TIABENDAZOLE                            |
| ey... | PNEUMOCYSTIS PNEUMONIA DRUGS            |
| ey1.. | PENTAMIDINE ISETHIONATE                 |
| ey2.. | ATOVAQUONE                              |
| ey3.. | TRIMETREXATE GLUCURONATE                |
| ez... | ANTIVIRAL DRUGS 2                       |
| ez1.. | DASABUVIR                               |
| ez2.. | OMBITASVIR+PARITAPREVIR+RITONAVIR       |
| ez3.. | ATAZANAVIR+COBICISTAT                   |
| f...  | ENDOCRINE DRUGS                         |
| f1... | SHORT-ACTING INSULIN PREPARATIONS       |
| f11.. | *SOLUBLE INSULIN                        |
| f12.. | SOLUBLE NEUTRAL INSULIN                 |
| f13.. | INSULIN LISPRO                          |
| f14.. | INSULIN ASPART                          |
| f15.. | INSULIN GLULISINE                       |
| f2... | MEDIUM/LONG-ACTING INSULINS             |
| f21.. | BIPHASIC INSULIN                        |
| f22.. | INSULIN ZINC SUSPENSION                 |
| f23.. | INSULIN ZINC SUSPENSION - AMORPHOUS     |
| f24.. | INSULIN ZINC SUSPENSION - CRYSTALLINE   |
| f25.. | ISOPHANE INSULIN                        |
| f26.. | PROTAMINE ZINC INSULIN                  |
| f27.. | BIPHASIC ISOPHANE INSULIN               |
| f28.. | BIPHASIC ISOPHANE INSULIN 2             |
| f29.. | INSULIN GLARGINE                        |
| f2A.. | INSULIN DETEMIR                         |
| f2B.. | INSULIN DEGLUDEC                        |

|       |                                               |
|-------|-----------------------------------------------|
| f2C.. | INSULIN DEGLUDEC + LIRAGLUTIDE                |
| f3... | SULFONYLUREAS                                 |
| f31.. | *ACETOHEXAMIDE                                |
| f32.. | CHLORPROPAMIDE                                |
| f33.. | GLIBENCLAMIDE                                 |
| f34.. | *GLIBORNURIDE                                 |
| f35.. | GLICLAZIDE                                    |
| f36.. | GLIPIZIDE                                     |
| f37.. | GLIQUIDONE                                    |
| f38.. | *GLYMIDINE                                    |
| f39.. | TOLAZAMIDE                                    |
| f3a.. | TOLBUTAMIDE                                   |
| f3A.. | GLIMEPIRIDE                                   |
| f4... | BIGUANIDES                                    |
| f41.. | METFORMIN HYDROCHLORIDE                       |
| f5... | GUAR                                          |
| f51.. | GUAR GUM                                      |
| f6... | DIABETIC KETOACIDOSIS [no drugs here]         |
| f7... | HYPOGLYCAEMIA TREATMENT                       |
| f71.. | DIAZOXIDE [ENDOCRINE USE]                     |
| f72.. | GLUCAGON                                      |
| f73.. | GLUCOSE [ENDOCRINE]                           |
| f8... | DIABETIC NEUROPATHY TREATMENT [no drugs here] |
| f9... | THYROID HORMONES                              |
| f91.. | LIOTHYRONINE SODIUM                           |
| f92.. | LEVOTHYROXINE SODIUM                          |
| fa... | ANTITHYROID DRUGS                             |
| fa1.. | CARBIMAZOLE                                   |
| fa2.. | IODINE                                        |
| fa3.. | PROPYLTHIOURACIL                              |
| fb... | CORTICOSTEROID REPLACEMENT THERAPY            |
| fb1.. | FLUDROCORTISONE ACETATE                       |
| fb2.. | DEOXYCORTONE PIVALATE [no preparations]       |
| fc... | STEROID DISEASE SUPPRESSION [no drugs here]   |
| fd... | CORTICOSTEROID DISADVANTAGES [no drugs here]  |
| fe... | CORTICOSTEROID CLINICAL USE                   |
| fe1.. | BETAMETHASONE                                 |
| fe2.. | CORTISONE ACETATE                             |
| fe3.. | DEXAMETHASONE [ENDOCRINE]                     |
| fe4.. | HYDROCORTISONE                                |
| fe5.. | METHYLPREDNISOLONE [ENDOCRINE]                |
| fe6.. | PREDNISOLONE [ENDOCRINE]                      |
| fe7.. | PREDNISONE                                    |
| fe8.. | TRIAMCINOLONE [ENDOCRINE]                     |
| fe9.. | DEFLAZACORT                                   |

|       |                                               |
|-------|-----------------------------------------------|
| ff..  | OESTROGENS                                    |
| ff1.. | ETHINYLESTRADIOL [ENDOCRINE]                  |
| ff2.. | ESTRADIOL                                     |
| ff3.. | ESTRIOL [ENDOCRINE]                           |
| ff4.. | CONJUGATED OESTROGENS [ENDOCRINE]             |
| ff5.. | PIPERAZINE ESTRONE SULFATE                    |
| ff6.. | *QUINESTRADOL                                 |
| ff7.. | *QUINESTROL                                   |
| ff8.. | TIBOLONE                                      |
| ff9.. | MORE ESTRADIOL 1                              |
| fg..  | PROGESTOGENS                                  |
| fg1.. | ALLYLOESTRENOL                                |
| fg2.. | DYDROGESTERONE                                |
| fg3.. | HYDROXYPROGESTERONE CAPROATE                  |
| fg4.. | MEDROXYPROGEST AC [ENDOCRINE]                 |
| fg5.. | NORETHISTERONE [ENDOCRINE]                    |
| fg6.. | PROGESTERONE                                  |
| fh..  | COMBINED OESTROGEN + PROGESTOGEN PREPARATIONS |
| fh1.. | MENSTRUAL SYMPTOMS - COMBINED PREPARATIONS    |
| fh2.. | MENSTRUAL DISORDER COMB.PREPS                 |
| fi..  | MALE SEX HORMONES+ANTAGONISTS                 |
| fi1.. | CYPROTERONE ACETATE [ENDOCRINE]               |
| fi2.. | MESTEROLONE                                   |
| fi3.. | *METHYLTESTOSTERONE                           |
| fi4.. | TESTOSTERONE                                  |
| fi5.. | TESTOSTERONE ESTERS                           |
| fi6.. | FINASTERIDE                                   |
| fi7.. | DUTASTERIDE                                   |
| fj..  | ANABOLIC STEROIDS                             |
| fj1.. | NANDROLONE [ENDOCRINE]                        |
| fj2.. | STANZOLOL [ENDOC]                             |
| fk..  | HYPOTHALAMIC + ANTERIOR PITUITARY HORMONES    |
| fk1.. | CHORIONIC GONADOTROPHIN                       |
| fk2.. | CLOMIFENE CITRATE                             |
| fk3.. | CORTICOTROPIN (ACTH)                          |
| fk4.. | *CYCLOFENIL                                   |
| fk5.. | FOLLICLE-STIMULATING HORMONE                  |
| fk6.. | *SOMATREM                                     |
| fk7.. | TETRACOSACTIDE                                |
| fk8.. | SOMATROPIN                                    |
| fk9.. | SERMORELIN ACETATE                            |
| fkA.. | SOMATROPIN [2]                                |
| fkB.. | LUTROPIN ALFA                                 |
| fkC.. | FOLLITROPIN [2]                               |
| fkD.. | MECASERMIN                                    |

|       |                                               |
|-------|-----------------------------------------------|
| fkE.. | CORIFOLLITROPIN ALFA                          |
| fkF.. | HUMAN MENOPAUSAL GONADOTROPHINS               |
| fl... | POSTERIOR PITUITARY HORMONES                  |
| fl1.. | DESMOPRESSIN                                  |
| fl2.. | LYPRESSIN                                     |
| fl3.. | *PITUITARY (POSTERIOR LOBE)                   |
| fl4.. | TERLIPRESSIN                                  |
| fl5.. | VASOPRESSIN                                   |
| fm... | ANTIDIURETIC HORMONE ANTAGON. [no drugs here] |
| fn... | CALCITONIN AND CALCITONIN(SALMON)             |
| fn1.. | CALCITONIN                                    |
| fn2.. | CALCITONIN(SALMON)                            |
| fo... | BISPHOSPHONATES                               |
| fo1.. | DISODIUM ETIDRONATE                           |
| fo2.. | PAMIDRONATE DISODIUM                          |
| fo3.. | SODIUM CLODRONATE                             |
| fo4.. | ALENDRONIC ACID                               |
| fo5.. | DISODIUM TILUDRONATE                          |
| fo6.. | RISEDRONATE SODIUM                            |
| fo7.. | ZOLEDRONIC ACID                               |
| fo8.. | IBANDRONIC ACID                               |
| fp... | BROMOCRIPTINE [ENDOCRINE]                     |
| fp1.. | BROMOCRIPTINE [ENDOCRINE]                     |
| fq... | ENDOCRINE DIAGNOSTIC AGENTS                   |
| fq1.. | GONADORELIN                                   |
| fq2.. | METYRAPONE                                    |
| fq3.. | PROTIRELIN                                    |
| fq4.. | *THYROTROPHIN                                 |
| fq5.. | THYROTROPIN ALFA                              |
| fr... | ENDOMETRIOSIS DRUGS                           |
| fr1.. | DANAZOL                                       |
| fr2.. | GESTRINONE                                    |
| fr3.. | NAFARELIN ACETATE                             |
| fr4.. | BUSERELIN ACETATE [ENDOMETRIOSIS]             |
| fs... | TRILOSTANE                                    |
| fs1.. | TRILOSTANE                                    |
| ft... | OTHER DRUGS USED IN DIABETES                  |
| ft1.. | ACARBOSE                                      |
| ft2.. | TROGLITAZONE                                  |
| ft3.. | REPAGLINIDE                                   |
| ft4.. | ROSIGLITAZONE                                 |
| ft5.. | PIOGLITAZONE                                  |
| ft6.. | NATEGLINIDE                                   |
| ft7.. | METFORMIN + PIOGLITAZONE                      |
| ft8.. | SITAGLIPTIN                                   |



|        |                                                          |
|--------|----------------------------------------------------------|
| ft9..  | EXENATIDE                                                |
| fta..  | VILDAGLIPTIN                                             |
| ftb..  | METFORMIN + VILDAGLIPTIN                                 |
| ftc..  | LIRAGLUTIDE                                              |
| ftd..  | SAXAGLIPTIN                                              |
| fte..  | METFORMIN + SITAGLIPTIN                                  |
| ftf..  | LINAGLIPTIN                                              |
| ftg..  | METFORMIN + LINAGLIPTIN                                  |
| ft h.. | DAPAGLIFLOZIN                                            |
| fti..  | METFORMIN + SAXAGLIPTIN                                  |
| ftj..  | LIXISENATIDE                                             |
| ftk..  | ALOGLIPTIN                                               |
| ftl..  | METFORMIN + ALOGLIPTIN                                   |
| ftm..  | METFORMIN + DAPAGLIFLOZIN                                |
| ftn..  | CANAGLIFLOZIN                                            |
| fto..  | EMPAGLIFLOZIN                                            |
| ftp..  | METFORMIN + CANAGLIFLOZIN                                |
| ftq..  | DULAGLUTIDE                                              |
| ft r.. | METFORMIN + EMPAGLIFLOZIN                                |
| fu...  | OTHER ENDOCRINE DRUGS                                    |
| fu1..  | CABERGOLINE                                              |
| fu2..  | QUINAGOLIDE                                              |
| fu3..  | TERIPARATIDE                                             |
| fu4..  | PEGVISOMANT                                              |
| fu5..  | STRONTIUM                                                |
| fu6..  | CINACALCET                                               |
| fu7..  | PARATHYROID HORMONE                                      |
| fu8..  | TOLVAPTAN                                                |
| fu9..  | DENOSUMAB                                                |
| fv...  | SELECTIVE OESTROGEN RECEPTOR MODULATOR                   |
| fv1..  | RALOXIFENE HYDROCHLORIDE                                 |
| fw...  | SHORT WITH INTERMEDIATE-ACTING INSULINS                  |
| fw1..  | BIPHASIC ISOPHANE INSULIN LISPRO                         |
| fw2..  | BIPHASIC INSULIN ASPART                                  |
| fz...  | LUTEINISING HORMONE RELEASING HORMONE ANTAGONIST PRODUCT |
| fz1..  | CETRORELIX                                               |
| fz2..  | GANIRELIX                                                |
| g...   | OBS/GYNAE/UTI DRUGS                                      |
| g1...  | PROSTAGLANDINS & OXYTOCICS                               |
| g11..  | DINOPROST                                                |
| g12..  | DINOPROSTONE                                             |
| g13..  | ERGOMETRINE MALEATE                                      |
| g14..  | GEMEPROST                                                |
| g15..  | OXYTOCIN                                                 |
| g16..  | ALPROSTADIL                                              |

|       |                                                      |
|-------|------------------------------------------------------|
| g17.. | CARBOPROST                                           |
| g18.. | MIFEPRISTONE                                         |
| g19.. | CARBETOCIN                                           |
| g2... | MYOMETRIAL RELAXANTS                                 |
| g21.. | ISOXSUPRINE HYDROCHLORIDE [GYNAECOLOGICAL USE]       |
| g22.. | ORCIPRENALINE SULPHATE [OBSTETRIC USE]               |
| g23.. | RITODRINE HYDROCHLORIDE                              |
| g24.. | SALBUTAMOL [OBSTETRIC]                               |
| g25.. | TERBUTALINE SULFATE [MYOMETRIAL RELAXANT]            |
| g26.. | ATOSIBAN                                             |
| g3... | VAGINAL TOPICAL HORMONES                             |
| g31.. | CONJUG OESTROGEN [TOPICAL VAGINAL]                   |
| g32.. | DIENESTROL                                           |
| g33.. | ESTRIOL [GYNAECOLOGICAL USE]                         |
| g34.. | DIETHYLSTILBESTROL [GYNAECOLOGICAL USE]              |
| g35.. | ESTRADIOL [GYNAE]                                    |
| g4... | GENITAL ANTIFUNGAL PREPARATIONS                      |
| g41.. | AMPHOTERICIN [GYNAECOLOGICAL USE]                    |
| g42.. | CLOTRIMAZOLE                                         |
| g43.. | ECONAZOLE NITRATE [GYNAECOLOGICAL USE]               |
| g44.. | ISOCONAZOLE NITRATE                                  |
| g45.. | KETOCONAZOLE [GYNAECOLOGICAL USE]                    |
| g46.. | MICONAZOLE [GENITAL]                                 |
| g47.. | NATAMYCIN [GYNAECOLOGICAL USE]                       |
| g48.. | NYSTATIN [GYNAECOLOGICAL USE]                        |
| g49.. | FENTICONAZOLE                                        |
| g5... | VAGINAL ANTIBACTERIAL PREPARATIONS                   |
| g51.. | MIXED ANTIBACTERIAL VAGINAL PREPARATIONS             |
| g52.. | CLINDAMYCIN PHOSPHATE                                |
| g53.. | METRONIDAZOLE [VAGINAL]                              |
| g6... | VAGINAL ANTISEPTIC PREPARATIONS                      |
| g61.. | ACETIC ACID                                          |
| g62.. | POVIDONE-IODINE [GYNAECOLOGICAL USE]                 |
| g63.. | *HYDRAGAPHEN                                         |
| g7... | VAGINAL INFECTIONS OTHER PREPS                       |
| g71.. | *LACTOBACILL ACIDOPHIL VACCINE                       |
| g8... | COMBINED ORAL CONTRACEPTIVE - ETHINYLOESTRADIOL      |
| g81.. | DESOGESTREL                                          |
| g82.. | ETYNODIOL DIACETATE [COMBINED ORAL CONTRACEPTIVE]    |
| g83.. | LEVONORGESTREL [COMBINED ORAL CONTRACEPTIVE]         |
| g84.. | *LYNOESTRENOL                                        |
| g85.. | NORGESTREL [COMBINED ORAL CONTRACEPTIVE]             |
| g86.. | NORETHISTERONE [COMBINED ORAL CONTRACEPTIVE]         |
| g87.. | NORETHISTERONE ACETATE [COMBINED ORAL CONTRACEPTIVE] |
| g88.. | GESTODENE [COMBINED ORAL CONTRACEPTIVE]              |

|       |                                                              |
|-------|--------------------------------------------------------------|
| g89.. | NORGESTIMATE [COMBINED OC]                                   |
| g8A.. | DROSPIRENONE                                                 |
| g9... | COMBINED ORAL CONTRACEPTIVE - MESTRANOL                      |
| g91.. | NORETHISTERONE [COMBINED ORAL CONTRACEPTIVE]                 |
| ga... | PROGESTOGEN ONLY CONTRACEPTIVE                               |
| gA... | PERITONEAL DIALYSIS SOLUTIONS                                |
| ga1.. | ETYNODIOL DIACETATE [PROGESTOGEN ORAL CONTRACEPTIVE]         |
| gA1.. | AMINO ACIDS PERITONEAL DIALYSIS SOLUTION                     |
| ga2.. | LEVONORGESTREL [PROGESTOGEN CONTRACEPTIVE]                   |
| gA2.. | LOW GLUCOSE CONCENTRATION PERITONEAL DIALYSIS SOLUTION       |
| ga3.. | MEDROXYPROGESTERONE ACETATE [PROGESTOGEN ORAL CONTRACEPTIVE] |
| gA3.. | MEDIUM GLUCOSE CONCENTRATION PERITONEAL DIALYSIS SOLUTION    |
| ga4.. | NORGESTREL [PROGESTOGEN ORAL CONTRACEPTIVE]                  |
| gA4.. | HIGH GLUCOSE CONCENTRATION PERITONEAL DIALYSIS SOLUTION      |
| ga5.. | NORETHISTERONE [PROGESTOGEN ORAL CONTRACEPTIVE]              |
| gA5.. | ICODextrin PERITONEAL DIALYSIS SOLUTION                      |
| ga6.. | NORETHISTERONE OENANTHATE                                    |
| ga7.. | ETONOGESTREL                                                 |
| ga8.. | DESOGESTREL [PROGESTOGEN ONLY CONTRACEPTIVE]                 |
| ga9.. | ULIPRISTAL ACETATE                                           |
| gb... | SPERMICIDAL CONTRACEPTIVES                                   |
| gb1.. | NONOXINOL                                                    |
| gb2.. | OCTOXINOL                                                    |
| gb3.. | P-DI-ISOBUTYLPHENOXYPOLYETHOXYETHANOL                        |
| gc... | URINARY RETENTION DRUGS                                      |
| gc1.. | BETHANECHOL CHLORIDE                                         |
| gc2.. | CARBACHOL [URINE RETENTION]                                  |
| gc3.. | *DISTIGMINE BROMIDE [URINARY]                                |
| gc4.. | PHENOXYBENZAMINE HYDROCHLORIDE [URINARY RETENTION USE]       |
| gc5.. | TERAZOSIN HYDROCHLORIDE [see chap b for generic preps]       |
| gc6.. | ALFUZOSIN HYDROCHLORIDE                                      |
| gc7.. | TAMSULOSIN HYDROCHLORIDE                                     |
| gc8.. | DUTASTERIDE+TAMSULOSIN HYDROCHLORIDE                         |
| gc9.. | SOLIFENACIN+TAMSULOSIN                                       |
| gd... | ENURESIS FREQUENCY INCONTINENCE                              |
| gd1.. | AMITRIPTYLINE HCL [ENURESIS - no drugs here]                 |
| gd2.. | *EMEPRONIUM BROMIDE                                          |
| gd3.. | EPHEDRINE HCL [ENURESIS]                                     |
| gd4.. | FLAVOXATE HYDROCHLORIDE                                      |
| gd5.. | IMPRAMINE HCL [ENURESIS - no drugs here]                     |
| gd6.. | NORTRIPTYLINE HCL [ENURESIS - no drugs here]                 |
| gd7.. | PHENYLPROPANOLAMINE HYDROCHLOR                               |
| gd8.. | PROPANTHELINE BR [ENURESIS - no drugs here]                  |
| gd9.. | *TERODILINE HYDROCHLORIDE                                    |
| gda.. | OXYBUTYNIN                                                   |

|       |                                                   |
|-------|---------------------------------------------------|
| gdA.. | TOLTERODINE L-TARTRATE                            |
| gdb.. | COLLAGEN IMPLANTS                                 |
| gdB.. | TROSPIUM CHLORIDE [ENURESIS]                      |
| gdc.. | PROPIVERINE HYDROCHLORIDE                         |
| gdd.. | SOLIFENACIN                                       |
| gde.. | DULOXETINE                                        |
| gdf.. | DARIFENACIN                                       |
| gdg.. | FESOTERODINE FUMARATE                             |
| gdh.. | MIRABEGRON                                        |
| ge... | URINARY ANALGESIA & PH CHANGE                     |
| ge1.. | ASCORBIC ACID [URINE PH - no drugs here]          |
| ge2.. | *PHENAZOPYRIDINE HYDROCHLORIDE                    |
| ge3.. | POTASSIUM CITRATE                                 |
| ge4.. | SODIUM BICARBONATE [URINE PH]                     |
| ge5.. | SODIUM CITRATE                                    |
| ge6.. | OTHER URINARY DISORDER PREPARATIONS               |
| gf... | BLADDER INSTILLATIONS                             |
| gf1.. | SIMPLE BLADDER INSTILLATIONS                      |
| gf2.. | CATHETER PATENCY SOLUTIONS                        |
| gf3.. | DIAGNOSTIC BLADDER AGENTS                         |
| gg... | VAGINAL LUBRICANTS                                |
| gg1.. | PETROLEUM JELLY                                   |
| gg2.. | POLYCARBOPHIL                                     |
| gg3.. | AQUEOUS LUBRICANTS                                |
| gh... | TREATMENT OF SEXUAL DYSFUNCTION AND IMPOTENCE     |
| gh1.. | YOHIMBINE/PEMOLINE/METHYLTESTOSTERONE             |
| gh2.. | ALPROSTADIL [ERECTILE DYSFUNCTION]                |
| gh3.. | PAPAVERINE                                        |
| gh4.. | MOXISYLYTE HCL [ERECTILE DYSFUNCT]                |
| gh5.. | SILDENAFIL                                        |
| gh6.. | APOMORPHINE HYDROCHLORIDE [ERECTILE DYSFUNCTION]  |
| gh7.. | TADALAFIL                                         |
| gh8.. | VARDENAFIL                                        |
| gh9.. | YOHIMBINE                                         |
| ghA.. | AVANAFIL                                          |
| gi... | VAGINAL PH IMBALANCE                              |
| gi1.. | LACTIC ACID                                       |
| gi2.. | POLYSACCHARIDE COMPLEX                            |
| gj... | CONTRACEPTIVE IMPLANT                             |
| gj1.. | COMBINED CONTRACEPTIVE IMPLANT                    |
| gk... | COMBINED ORAL CONTRACEPTIVE - ESTRADIOL VALERATE  |
| gk1.. | DIENOGEST (COMBINED ORAL CONTRACEPTIVE)           |
| gl... | COMBINED ORAL CONTRACEPTIVE - ESTRADIOL           |
| gl1.. | NOMEGESTROL ACETATE (COMBINED ORAL CONTRACEPTIVE) |
| gm... | PREMATURE EJACULATION                             |

|       |                                              |
|-------|----------------------------------------------|
| gm1.. | DAPOXETINE                                   |
| h.... | CHEMOTHERAPY/IMMUNOSUPPRESSANT DRUGS         |
| h1... | ALKYLATING DRUGS                             |
| h11.. | BUSULFAN                                     |
| h12.. | CARMUSTINE                                   |
| h13.. | CHLORAMBUCIL                                 |
| h14.. | CYCLOPHOSPHAMIDE                             |
| h15.. | ESTRAMUSTINE PHOSPHATE                       |
| h16.. | *ETHOGLUCID                                  |
| h17.. | IFOSFAMIDE                                   |
| h18.. | LOMUSTINE                                    |
| h19.. | MELPHALAN                                    |
| h1a.. | MITOBRONITOL                                 |
| h1b.. | *MUSTINE HYDROCHLORIDE                       |
| h1c.. | THIOTEPA                                     |
| h1d.. | TREOSULFAN                                   |
| h1e.. | BENDAMUSTINE HYDROCHLORIDE                   |
| h2... | CYTOTOXIC ANTIBIOTICS                        |
| h21.. | ACTINOMYCIN D                                |
| h22.. | BLEOMYCIN                                    |
| h23.. | DOXORUBICIN HYDROCHLORIDE                    |
| h24.. | EPIRUBICIN HYDROCHLORIDE                     |
| h25.. | MITOMYCIN                                    |
| h26.. | PLICAMYCIN                                   |
| h27.. | IDARUBICIN HYDROCHLORIDE                     |
| h28.. | *ACLARUBICIN                                 |
| h29.. | DAUNORUBICIN                                 |
| h3... | ANTIMETABOLITES                              |
| h31.. | CYTARABINE                                   |
| h32.. | FLUOROURACIL                                 |
| h33.. | MERCAPTOPURINE                               |
| h34.. | METHOTREXATE                                 |
| h35.. | TIOGUANINE                                   |
| h36.. | GEMCITABINE                                  |
| h38.. | MERCURIC OXIDE [ANTIMETABOLITE]no drugs here |
| h39.. | RALTITREXED                                  |
| h3A.. | CAPECITABINE                                 |
| h3B.. | TEGAFUR+URACIL                               |
| h3C.. | PEMETREXED                                   |
| h3D.. | CLOFARABINE                                  |
| h3E.. | NELARABINE                                   |
| h3F.. | AZACITIDINE                                  |
| h3G.. | METHOTREXATE(2)                              |
| h3H.. | TEGAFUR                                      |
| h3I.. | DECITABINE                                   |

|       |                                     |
|-------|-------------------------------------|
| h4... | VINCA ALKALOIDS + ETOPOSIDE         |
| h41.. | ETOPOSIDE                           |
| h42.. | VINBLASTINE SULFATE                 |
| h43.. | VINCRISTINE SULFATE                 |
| h44.. | VINDESINE SULFATE                   |
| h45.. | VINORELBINE                         |
| h46.. | VINFLUNINE DITARTRATE               |
| h5... | OTHER CYTOTOXIC DRUGS               |
| h51.. | AMSACRINE                           |
| h52.. | CARBOPLATIN                         |
| h53.. | CISPLATIN                           |
| h54.. | DACARBAZINE                         |
| h55.. | HYDROXYCARBAMIDE                    |
| h56.. | MITOXANTRONE                        |
| h57.. | PROCARBAZINE                        |
| h58.. | RAZOXANE                            |
| h59.. | CRISANTASPASE                       |
| h5A.. | PENTOSTATIN                         |
| h5B.. | PACLITAXEL                          |
| h5C.. | FLUDARABINE                         |
| h5D.. | CLADRIBINE                          |
| h5E.. | DOCETAXEL                           |
| h5F.. | TOPOTECAN                           |
| h5G.. | IRINOTECAN HYDROCHLORIDE TRIHYDRATE |
| h5H.. | ALTRETAMINE                         |
| h5I.. | OXALIPLATIN                         |
| h5J.. | TEMOZOLOMIDE                        |
| h5K.. | VERTEPORFIN                         |
| h5L.. | METHYL AMINOLEVULINATE              |
| h5M.. | PIXANTRONE                          |
| h6... | ANTAGONISTS + CYTOTOXICS            |
| h61.. | MESNA                               |
| h62.. | DEXRAZOXANE                         |
| h7... | CYTOTOXIC IMMUNOSUPPRESSANTS        |
| h71.. | AZATHIOPRINE [IMMUNOSUPPRESSANT]    |
| h8... | OTHER IMMUNOSUPPRESSANTS            |
| h81.. | ANTILYMPHOCYTE IMMUNOGLOBULIN       |
| h82.. | CICLOSPORIN                         |
| h83.. | TACROLIMUS                          |
| h84.. | MYCOPHENOLATE                       |
| h85.. | SIROLIMUS                           |
| h86.. | ANAKINRA                            |
| h87.. | ADALIMUMAB                          |
| h88.. | EFALIZUMAB                          |
| h89.. | ETANERCEPT                          |

|       |                                  |
|-------|----------------------------------|
| h8A.. | NATALIZUMAB                      |
| h8B.. | INFLIXIMAB                       |
| h8C.. | ABATACEPT                        |
| h8D.. | ANTITHYMOCYTE IMMUNOGLOBULIN     |
| h8E.. | USTEKINUMAB                      |
| h8F.. | TOCILIZUMAB                      |
| h8G.. | CERTOLIZUMAB PEGOL               |
| h8H.. | CANAKINUMAB                      |
| h8I.. | GOLIMUMAB                        |
| h8J.. | FINGOLIMOD                       |
| h8K.. | BELIMUMAB                        |
| h8L.. | BELATACEPT                       |
| h8M.. | PIRFENIDONE                      |
| h8N.. | POMALIDOMIDE                     |
| h8O.. | SILTUXIMAB                       |
| h8P.. | VEDOLIZUMAB                      |
| h8Q.. | APREMILAST                       |
| h8R.. | SECUKINUMAB                      |
| h9... | IMMUNOSTIMULANTS                 |
| h91.. | CORYNEBACTERIUM PARVUM VACCINE   |
| h92.. | MOLGRAMOSTIM                     |
| h93.. | LEVAMISOLE HCL [IMMUNOSTIMULANT] |
| h94.. | LENOGRASTIM                      |
| h95.. | AMIFOSTINE                       |
| h96.. | PLERIXAFOR                       |
| h97.. | MIFAMURTIDE                      |
| h98.. | HISTAMINE                        |
| ha... | INTERFERONS                      |
| ha1.. | INTERFERONS                      |
| ha2.. | INTERFERONS (2)                  |
| ha3.. | INTERFERONS (3)                  |
| ha5.. | DACLIZUMAB                       |
| hb... | OESTROGENS IN MALIGNANCY         |
| hb1.. | ETHINYLOESTRADIOL [MALIGNANCY]   |
| hb2.. | FOSFESTROL TETRASODIUM           |
| hb3.. | POLYESTRADIOL PHOSPHATE          |
| hb4.. | DIETHYLSTILBESTROL [MALIGNANCY]  |
| hc... | PROGESTOGENS IN MALIGNANCY       |
| hc1.. | GESTONORONE HEXANOATE            |
| hc2.. | MEDROXYPROGEST AC [MALIGNANCY]   |
| hc3.. | MEGESTROL ACETATE                |
| hc4.. | NORETHISTERONE [MALIGNANCY]      |
| hc5.. | NORETHISTERONE AC [MALIGNANCY]   |
| hd... | ANDROGENS + ANABOLIC STEROIDS    |
| hd1.. | *DROSTANOLONE PROPIONATE         |

|       |                                         |
|-------|-----------------------------------------|
| hd2.. | NANDROLONE [malignancy] [no preps here] |
| he... | HORMONE ANTAGONISTS                     |
| he1.. | AMINOGLUTETHIMIDE                       |
| he2.. | BUSERELIN                               |
| he3.. | CYPROTERONE ACET [MALIGNANCY]           |
| he4.. | TAMOXIFEN                               |
| he5.. | GOSERELIN                               |
| he6.. | OCTREOTIDE ACETATE                      |
| he7.. | FLUTAMIDE                               |
| he8.. | LEUPRORELIN ACETATE                     |
| he9.. | FORMESTANE                              |
| heA.. | BICALUTUMIDE                            |
| heB.. | TRIPTORELIN                             |
| heC.. | ANASTROZOLE                             |
| heD.. | TOREMIFENE                              |
| heE.. | LETROZOLE                               |
| heF.. | LANREOTIDE                              |
| heG.. | EXEMESTANE                              |
| heH.. | FULVESTRANT                             |
| heI.. | DEGARELIX                               |
| heJ.. | HISTRELIN                               |
| heK.. | ABIRATERONE ACETATE                     |
| heL.. | PASIREOTIDE                             |
| heM.. | ENZALUTAMIDE                            |
| hf... | INTERLEUKINS                            |
| hf1.. | ALDESLEUKIN                             |
| hg... | CYTOSTATIC DRUGS                        |
| hg1.. | TRETINOIN [CYTOSTATIC]                  |
| hh... | OTHER ANTINEOPLASTIC AGENTS             |
| hh1.. | RITUXIMAB                               |
| hh2.. | TRASTUZUMAB                             |
| hh3.. | ALEMTUZUMAB                             |
| hh4.. | IMATINIB                                |
| hh5.. | BEXAROTENE                              |
| hh6.. | TEMOPORFIN                              |
| hh7.. | ARSENIC                                 |
| hh8.. | BORTEZOMIB                              |
| hh9.. | CETUXIMAB                               |
| hha.. | RUXOLITINIB                             |
| hhA.. | ANAGRELIDE                              |
| hhb.. | AXITINIB                                |
| hhB.. | BEVACIZUMAB                             |
| hhc.. | CRIZOTINIB                              |
| hhC.. | ERLOTINIB                               |
| hhd.. | BRENTUXIMAB VEDOTIN                     |



|       |                             |
|-------|-----------------------------|
| hhD.. | MITOTANE PRODUCT            |
| hhe.. | PERTUZUMAB                  |
| hhE.. | SORAFENIB                   |
| hhf.. | BOSUTINIB                   |
| hhF.. | SUNITINIB                   |
| hhg.. | PONATINIB                   |
| hhG.. | DASATINIB                   |
| hhh.. | REGORAFENIB                 |
| hhH.. | LENALIDOMIDE                |
| hhi.. | VISMODEGIB                  |
| hhI.. | ECULIZUMAB                  |
| hhj.. | AFATINIB                    |
| hhJ.. | PANITUMUMAB                 |
| hhk.. | DABRAFENIB                  |
| hhK.. | TRABECTEDIN                 |
| hhl.. | TRASTUZUMAB EMTANSINE       |
| hhL.. | NILOTINIB                   |
| hhm.. | OBINUTUZUMAB                |
| hhM.. | LAPATINIB                   |
| hhn.. | IDELALISIB                  |
| hhN.. | THALIDOMIDE                 |
| hho.. | RAMUCIRUMAB                 |
| hhO.. | TEMSIROLIMUS                |
| hhp.. | IBRUTINIB                   |
| hhP.. | GEFITINIB                   |
| hhq.. | NINTEDANIB                  |
| hhQ.. | EVEROLIMUS                  |
| hhr.. | CABOZANTINIB                |
| hhR.. | OFATUMUMAB                  |
| hhs.. | OLAPARIB                    |
| hhS.. | PAZOPANIB                   |
| hht.. | NIVOLUMAB                   |
| hhT.. | ERIBULIN MESYLATE           |
| hhu.. | LENVATINIB                  |
| hhU.. | CABAZITAXEL                 |
| hhv.. | PEMBROLIZUMAB               |
| hhV.. | AMINOLEVULINIC ACID         |
| hhW.. | IPILIMUMAB                  |
| hhX.. | CATUMAXOMAB                 |
| hhY.. | VEMURAFENIB                 |
| hhZ.. | VANDETANIB                  |
| i.... | HAEMATOLOGY/DIETETIC DRUGS  |
| i1... | IRON DEFICIENCY - ORAL IRON |
| i11.. | FERROUS FUMARATE            |
| i12.. | FERROUS GLUCONATE           |

|       |                                          |
|-------|------------------------------------------|
| i13.. | FERROUS GLYCINE SULFATE                  |
| i14.. | FERROUS SUCCINATE                        |
| i15.. | FERROUS SULFATE                          |
| i16.. | IRON & FOLIC ACID                        |
| i17.. | POLYSACCHARIDE-IRON COMPLEX              |
| i18.. | SODIUM FEREDATE                          |
| i19.. | COMPOUND IRON PREPARATIONS               |
| i1z.. | IRON PRODUCT                             |
| i2... | PARENTERAL IRON THERAPY                  |
| i21.. | IRON DEXTRAN COMPLEX                     |
| i22.. | IRON SORBITOL COMPLEX                    |
| i23.. | IRON HYDROXIDE SUCROSE COMPLEX           |
| i24.. | IRON CARBOXYMALTOSE COMPLEX              |
| i25.. | IRON ISOMALTOSIDE COMPLEX                |
| i3... | MEGALOBlastic ANAEMIAS                   |
| i31.. | HYDROXOCOBALAMIN                         |
| i32.. | CYANOCOBALAMIN                           |
| i33.. | FOLIC ACID                               |
| i34.. | FOLINIC ACID                             |
| i4... | HYPOPLASTIC & HAEMOLYTIC ANAEMIA DRUGS   |
| i41.. | NANDROLONE [BLOOD]                       |
| i42.. | OXYMETHOLONE                             |
| i43.. | *STANOZOLOL [ANAEMIA]                    |
| i44.. | EPOETIN ALFA                             |
| i45.. | EPOETIN BETA                             |
| i46.. | FILGRASTIM                               |
| i47.. | DARBEOETIN ALFA                          |
| i48.. | PEGFILGRASTIM                            |
| i49.. | EPOETIN DELTA                            |
| i4A.. | METHOXY PEG-EPOETIN BETA                 |
| i4B.. | EPOETIN ZETA                             |
| i4C.. | EPOETIN THETA                            |
| i4D.. | LIPEGFILGRASTIM                          |
| i5... | THROMBOCYTOPENIC PURPURA [no drugs here] |
| i6... | ELECTROLYTES-ORAL-POTASSIUM              |
| i61.. | POTASSIUM SALTS                          |
| i7... | DRUGS FOR HYPERKALAEMIA                  |
| i71.. | POLYSTYRENE SULFONATE RESINS             |
| i8... | ELECTROLYTES-ORAL-SODIUM                 |
| i81.. | SODIUM SALTS                             |
| i9... | ELECTROLYTES INTRAVENOUS                 |
| i91.. | GLUCOSE - INTRAVENOUS                    |
| i92.. | POTASSIUM CHLORIDE I.V.                  |
| i93.. | SODIUM BICARBONATE I.V.                  |
| i94.. | SODIUM CHLORIDE I.V.                     |

|       |                                       |
|-------|---------------------------------------|
| i95.. | SODIUM LACTATE I.V.                   |
| i96.. | WATER FOR INJECTION                   |
| i97.. | POTASSIUM PHOSPHATE I.V               |
| i98.. | POTASSIUM ACID PHOSPHATE I.V          |
| i99.. | MAGNESIUM SULFATE I.V                 |
| ia... | PLASMA SUBSTITUTES                    |
| iA... | MINERALS - MAGNESIUM                  |
| ia1.. | DEXTRAN 40 I.V.INFUSION               |
| iA1.. | MAGNESIUM ASPARTATE HYDROCHLORIDE     |
| ia2.. | DEXTRAN 70 I.V.INFUSION               |
| ia3.. | DEXTRAN 110 intravenous infusion      |
| ia4.. | GELATIN                               |
| ia5.. | HETASTARCH                            |
| ia6.. | PENTASTARCH                           |
| ia7.. | ALBUMIN SOLUTION                      |
| ia8.. | HEXASTARCH                            |
| ia9.. | OTHER HYDROXYETHYL ETHER STARCH       |
| ib... | NUTRITION - INTRAVENOUS               |
| iB... | HAEM PRODUCTS                         |
| ib1.. | PARENTERAL NUTRITION A - F            |
| iB1.. | HAEM ARGINATE                         |
| ib2.. | PARENTERAL NUTRITION G - N            |
| ib3.. | PARENTERAL NUTRITION O - Z            |
| ib4.. | PARENTERAL SUPPLEMENTARY PREPARATIONS |
| ib5.. | PARENTERAL NUTRITION G - N (2)        |
| ic... | ORAL SUPPLEMENT                       |
| iC... | DRUGS USED IN HYPERURICAEMIA          |
| ic1.. | ORAL SUPPLEMENT                       |
| iC1.. | RASBURICASE                           |
| iC2.. | FEBUXOSTAT                            |
| id... | FOODS FOR SPECIAL DIETS               |
| iD... | MINERALS - SELENIUM                   |
| id1.. | GLUTEN FREE FOOD                      |
| iD1.. | SELENIUM PRODUCT                      |
| id2.. | GLUTEN FREE & PKU FOOD                |
| id3.. | PHENYLKETONURIA FOOD                  |
| id4.. | RENAL FAILURE/KETOGEN FOOD            |
| id5.. | MILK INTOLERANCE FOOD                 |
| id6.. | HYPOPROTEINAEMIA FOOD                 |
| id7.. | CYSTIC FIBROSIS FOOD                  |
| id8.. | *HYPERCHOLESTEROLAEMIA                |
| id9.. | GLUCOSE/GALACTOSE INTOLERANCE         |
| ida.. | GLYCOGEN STORAGE DISEASE              |
| idA.. | RENAL FAILURE/KETOGEN FOOD (2)        |
| idb.. | HOMOCYSTINURIA                        |

|       |                                                   |
|-------|---------------------------------------------------|
| idB.. | PHENYLKETONURIA FOOD [3]                          |
| idC.. | PROTEIN MALABSORPTION                             |
| idC.. | MORE GLUTEN FREE FOODS[7]                         |
| idd.. | FEED THICKENING PREPS                             |
| idD.. | CROHNS DISEASE                                    |
| ide.. | CALCIUM INTOLERANCE FOOD                          |
| idE.. | INHERITED METABOLIC DISORDERS                     |
| idf.. | MAPLE SYRUP URINE DISEASE                         |
| idF.. | PHENYLKETONURIA FOOD (4)                          |
| idG.. | LOW SODIUM FOOD                                   |
| idG.. | MORE GLUTEN FREE FOODS[8]                         |
| idh.. | MINERAL SUPPLEMENTS                               |
| idH.. | AMINOACIDOPATHY [OTHER] FOODS (2)                 |
| idi.. | CHRONIC LIVER DISEASE                             |
| idI.. | PHENYLKETONURIA FOOD (5)                          |
| idj.. | AMINOACIDOPATHY [OTHER] FOODS                     |
| idk.. | PROTEIN INTOLERANCE FOOD                          |
| idL.. | ADRENOLEUKODYSTROPHY FOODS                        |
| idm.. | MORE GLUTEN FREE FOODS                            |
| idn.. | ISOVALERIC ACIDAEMIA FOODS                        |
| ido.. | MORE GLUTEN FREE FOODS[2]                         |
| idp.. | LONG CHAIN ACYL-COA DEHYDROGENASE DEFICIENCY FOOD |
| idq.. | HYPERCHOLESTEROLAEMIA FOOD                        |
| idr.. | UREA CYCLE DISORDERS FOOD                         |
| ids.. | MORE GLUTEN FREE FOODS[3]                         |
| idt.. | PHENYLKETONURIA FOOD[2]                           |
| idu.. | MORE GLUTEN FREE FOODS[4]                         |
| idv.. | MORE GLUTEN FREE FOODS[5]                         |
| idw.. | MORE GLUTEN FREE FOODS[6]                         |
| idy.. | GLUTEN-FREE FOODS [GENERIC 1]                     |
| idz.. | GLUTEN-FREE FOODS [GENERIC]                       |
| ie... | SUPPLEMENT & COMPLETE FEEDS                       |
| iE... | PLASMA PRODUCT                                    |
| ie1.. | SUPP & COMP FEEDS A - F                           |
| ie1.. | C1-ESTERASE INHIBITOR                             |
| ie2.. | SUPPL. & COMPLETE FEEDS F - P                     |
| ie2.. | CONESTAT ALFA                                     |
| ie3.. | SUPPL. & COMPLETE FEEDS N - Z                     |
| ie4.. | DIALYSIS FOOD SUPPLEMENT                          |
| ie5.. | MORE SUPPLEMENT & COMPLETE FOODS A-Z              |
| ie6.. | MORE SUPPLEMENT & COMPLETE FOODS [1]              |
| ie7.. | MORE SUPPLEMENT & COMPLETE FOODS [2]              |
| ie8.. | MORE SUPPLEMENT & COMPLETE FOODS [3]              |
| ie9.. | MORE SUPPLEMENT & COMPLETE FOODS [4]              |
| ieA.. | MORE SUPPLEMENT & COMPLETE FOODS [5]              |

|       |                                       |
|-------|---------------------------------------|
| ieB.. | MORE SUPPLEMENT & COMPLETE FOODS [6]  |
| ieC.. | MORE SUPPLEMENT & COMPLETE FOODS [7]  |
| ieD.. | MORE SUPPLEMENT & COMPLETE FOODS [8]  |
| ieE.. | MORE SUPPLEMENT & COMPLETE FOODS [9]  |
| ieF.. | MORE SUPPLEMENT & COMPLETE FOODS [10] |
| ieG.. | MORE SUPPLEMENT & COMPLETE FOODS [11] |
| if..  | DIETARY SUPPLEMENTS - OTHER           |
| iF... | METHAEMOGLOBINAEMIA                   |
| if1.. | ORAL SUPPLEMENT - OTHER               |
| iF1.. | METHYLTHIONINIUM CHLORIDE             |
| ig... | MINERALS - CALCIUM SUPPLEMENTS        |
| ig1.. | CALCIUM SALTS                         |
| ih... | HYPERCALCAEMIA                        |
| ih1.. | SODIUM CELLULOSE PHOSPHATE            |
| ih2.. | TRISODIUM EDETATE                     |
| ii... | MINERALS-PHOSPHATE SUPPLEMENTS        |
| ii1.. | PHOSPHATE SALTS                       |
| ij... | PHOSPHATE BINDING AGENTS              |
| ij1.. | ALUMINIUM HYDROXIDE [NUTRITIONAL USE] |
| ij2.. | CALCIUM CARBONATE                     |
| ij3.. | CALCIUM ACETATE                       |
| ij4.. | SEVELAMER                             |
| ij5.. | LANTHANUM                             |
| ij6.. | CALCIUM ACETATE+MAGNESIUM CARBONATE   |
| ij7.. | COLESTILAN                            |
| ij8.. | SUCROFERRIC OXYHYDROXIDE              |
| ik... | MINERALS-FLUORIDE                     |
| ik1.. | SODIUM FLUORIDE                       |
| ik2.. | STANNOUS FLUORIDE                     |
| il... | MINERALS - ZINC                       |
| il1.. | ZINC SALTS                            |
| im... | VITAMIN A                             |
| im1.. | VITAMIN A                             |
| im2.. | COMPOUND A & D VITAMINS               |
| in... | VITAMIN B GROUP                       |
| in1.. | NICOTINAMIDE                          |
| in2.. | PYRIDOXINE HYDROCHLORIDE              |
| in3.. | RIBOFLAVIN                            |
| in4.. | THIAMINE HYDROCHLORIDE                |
| in5.. | VITAMINS B & C                        |
| in6.. | POTASSIUM AMINOBENZOATE               |
| in7.. | VITAMIN B COMPLEX                     |
| io... | VITAMIN C                             |
| io1.. | ASCORBIC ACID [NUTRITION]             |
| ip... | VITAMIN D                             |

|       |                                             |
|-------|---------------------------------------------|
| ip1.. | ALFACALCIDOL                                |
| ip2.. | CALCITRIOL                                  |
| ip3.. | CHOLECALCIFEROL OR ERGOCALCIFEROL           |
| ip4.. | DIHYDROTACHYSTEROL                          |
| ip5.. | PARICALCITOL                                |
| ip6.. | COLECALCIFEROL (2)                          |
| iq... | VITAMIN E                                   |
| iq1.. | ALPHA TOCOPHERYL ACETATE                    |
| iq2.. | D-ALPHA-TOCOPHEROL                          |
| ir... | VITAMIN K                                   |
| ir1.. | MENADIOL SODIUM PHOSPHATE                   |
| ir2.. | PHYTOMENADIONE                              |
| is... | MULTIVITAMIN PREPARATIONS                   |
| is1.. | MULTIVITAMINS                               |
| it... | BITTERS & TONICS                            |
| it1.. | TONICS                                      |
| it2.. | *STRYCHNINE [no preparations]               |
| iu... | DRUGS USED IN METABOLIC DISORDERS           |
| iu1.. | *PENICILLAMINE [METABOLIC]                  |
| iu2.. | TRIENTINE DIHYDROCHLORIDE                   |
| iu3.. | MERCAPTAMINE                                |
| iu4.. | SODIUM PHENYLBUTYRATE                       |
| iu5.. | MIGLUSTAT                                   |
| iu6.. | NITISINONE                                  |
| iu7.. | BETAINE                                     |
| iu8.. | SAPROPTERIN DIHYDROCHLORIDE                 |
| iv... | IRON POISONING                              |
| iv1.. | DEFERRIOXAMINE MESYLATE                     |
| iv2.. | DEFERIPRONE                                 |
| iv3.. | DEFERASIROX                                 |
| iw... | CARNITINE DEFICIENCY PRODUCTS               |
| iw1.. | CARNITINE PRODUCTS                          |
| ix... | ENZYME DEFICIENCY PRODUCTS                  |
| ix1.. | ALGLUCERASE                                 |
| ix2.. | IMIGLUCERASE                                |
| ix3.. | AGALSIDASE BETA                             |
| ix4.. | CARGLUMIC ACID                              |
| ix5.. | LARONIDASE                                  |
| ix6.. | ALGLUCOSIDASE ALFA                          |
| ix7.. | AGALSIDASE ALFA                             |
| ix8.. | IDURSULFASE                                 |
| ix9.. | GALSULFASE                                  |
| ixA.. | VELAGLUCERASE ALFA                          |
| iz... | OVER THE COUNTER SUPPLEMENTARY PRODUCTS     |
| iz1.. | OVER THE COUNTER HEALTHFOOD/HERBAL PRODUCTS |

|       |                                                      |
|-------|------------------------------------------------------|
| j...  | MUSCULOSKELETAL DRUGS                                |
| j1... | ASPIRIN AND THE SALICYLATES                          |
| j11.. | ASPIRIN [MUSCULOSKELETAL USE]                        |
| j12.. | BENORILATE [MUSCULOSKELETAL USE]                     |
| j13.. | CHOLINE MAGNES. TRISALICYLATE                        |
| j14.. | SALSALATE                                            |
| j15.. | SODIUM SALICYLATE                                    |
| j2... | NON-STEROIDAL ANTI-INFLAMMATORY DRUGS                |
| j21.. | AZAPROPAZONE                                         |
| j22.. | DICLOFENAC SODIUM                                    |
| j23.. | DIFLUNISAL [MUSCULOSKELETAL USE]                     |
| j24.. | ETODOLAC                                             |
| j25.. | FENBUFEN                                             |
| j26.. | FENOPROFEN [MUSCULOSKELETAL USE]                     |
| j27.. | FLURBIPROFEN                                         |
| j28.. | IBUPROFEN [MUSCULOSKELETAL USE]                      |
| j29.. | INDOMETACIN                                          |
| j2a.. | KETOPROFEN                                           |
| j2b.. | MEFENAMIC ACID [MUSCULOSKELETAL USE]                 |
| j2c.. | NAPROXEN                                             |
| j2d.. | PHENYLBUTAZONE                                       |
| j2e.. | PIROXICAM                                            |
| j2f.. | SULINDAC                                             |
| j2g.. | TIAPROFENIC ACID                                     |
| j2h.. | TOLMETIN                                             |
| j2i.. | PIROXICAM-BETADEX                                    |
| j2j.. | ACEMETACIN                                           |
| j2k.. | NABUMETONE                                           |
| j2l.. | TENOXICAM                                            |
| j2m.. | ACECLOFENAC                                          |
| j2n.. | MELOXICAM                                            |
| j2o.. | DICLOFENAC SODIUM 2                                  |
| j2p.. | IBUPROFEN [MUSCULOSKELETAL USE 2]                    |
| j2q.. | DEXKETOPROFEN                                        |
| j2r.. | DICLOFENAC POTASSIUM                                 |
| j2s.. | LORNOXICAM                                           |
| j2t.. | DEXIBUPROFEN                                         |
| j3... | SYSTEMIC STEROIDS + ACTH                             |
| j4... | LOCAL CORTICOSTEROID INJECTIONS                      |
| j41.. | DEXAMETHASONE SODIUM PHOSPHATE [MUSCULOSKELETAL USE] |
| j42.. | HYDROCORTISONE ACETATE [MUSCULOSKELETAL USE]         |
| j43.. | METHYLPREDNIS. ACETATE [MUSCULOSKELETAL USE]         |
| j44.. | PREDNISOLONE ACETATE [MUSCULOSKELETAL USE]           |
| j45.. | PREDNISOLONE SOD PHOS [MUSC-SK]                      |
| j46.. | TRIAMCINOLONE ACETONIDE [MUSCULOSKELETAL USE]        |

|       |                                                |
|-------|------------------------------------------------|
| j47.. | TRIAMCINOLONE HEXACETONIDE                     |
| j5... | RHEUMATIC DIS. PROCESS DRUGS                   |
| j51.. | SODIUM AUROTHIOMALATE                          |
| j52.. | PENICILLAMINE [MUSCULOSKELETAL USE]            |
| j53.. | CHLOROQUINE [MUSCULO-SKELETAL]                 |
| j54.. | HYDROXYCHLOROQUINE SULFATE [ANTI-RHEUMATIC]    |
| j55.. | SULFASALAZINE [MUSCULOSKELETAL USE]            |
| j56.. | AURANOFIN                                      |
| j57.. | HYLAN                                          |
| j58.. | SODIUM HYALURONATE [ANTI-RHEUMATIC]            |
| j59.. | LEFLUNOMIDE                                    |
| j6... | GOUT DRUGS                                     |
| j61.. | ALLOPURINOL                                    |
| j62.. | COLCHICINE                                     |
| j63.. | PROBENECID                                     |
| j64.. | SULFINPYRAZONE                                 |
| j7... | NEUROMUSCULAR TRANSMISSION DRUG                |
| j71.. | DISTIGMINE BROMIDE [MUSCULOSKELETAL USE]       |
| j72.. | EDROPHONIUM CHLOR [NEUROMUSCULAR TRANSMISSION] |
| j73.. | NEOSTIGMINE [NEUROMUSCULAR TRANSMISSION]       |
| j74.. | PYRIDOSTIGMINE BROMIDE                         |
| j75.. | AMIFAMPRIDINE                                  |
| j8... | SKELETAL MUSCLE RELAXANTS                      |
| j81.. | DIAZEPAM [SKELETAL MUSCLE RELAXANT]            |
| j82.. | BACLOFEN                                       |
| j83.. | *CARISOPRODOL                                  |
| j84.. | DANTROLENE SOD [MUSCULOSKELETAL USE]           |
| j85.. | METHOCARBAMOL                                  |
| j86.. | ORPHENADRINE CITRATE                           |
| j87.. | TIZANIDINE                                     |
| j9... | ENZYMES - SOFT TISSUE INFLAMMATION RELIEF      |
| j91.. | *BROMELAINS                                    |
| j92.. | CHYMOTRYPSIN [MUSCULOSKELETAL USE]             |
| j93.. | *DEOXYRIBONUCLEASE                             |
| j94.. | HYALURONIDASE                                  |
| ja... | RUBEFACIENTS + TOPICAL ANTIRHEUMATICS          |
| ja... | CYCLO-OXYGENASE-2 INHIBITOR DRUG               |
| ja1.. | TOPICAL ANTI-INFLAMMATORY PREP[1]              |
| ja1.. | *ROFECOXIB                                     |
| ja2.. | TOPICAL ANTI-INFLAMMATORY PREP[2]              |
| ja2.. | CELECOXIB                                      |
| ja3.. | TOPICAL ANTI-INFLAMMATORY PREP[3]              |
| ja3.. | PARECOXIB                                      |
| ja5.. | ETORICOXIB                                     |
| ja6.. | *VALDECOXIB                                    |



|       |                                                   |
|-------|---------------------------------------------------|
| jA7.. | *LUMIRACOXIB                                      |
| jb... | OTHER PREPS FOR INFLAMED JOINTS                   |
| jB... | BONE CEMENTS                                      |
| jb1.. | PARAFFIN WAX - LOW M.P.                           |
| jB1.. | GENTAMICIN BONE CEMENTS                           |
| jB2.. | PLAIN BONE CEMENTS                                |
| jB3.. | DIBOTERMIN ALFA                                   |
| jc... | SELECTIVE RELAXANT BINDING AGENT                  |
| jc1.. | SUGAMMADEX                                        |
| jd... | ENZYMES - DISORDER OF THE MUSCULO-SKELETAL SYSTEM |
| jd1.. | COLLAGENASE                                       |
| k.... | EYE DRUGS                                         |
| k1... | ADMINISTRATION OF EYE DRUGS -[no drugs here]      |
| k2... | CONTROL OF MICROBIAL CONTAMIN.-[no drugs here]    |
| k3... | TOPICAL PREPARATIONS [EYE]                        |
| k31.. | ACICLOVIR [EYES]                                  |
| k32.. | CHLORAMPHENICOL [EYE]                             |
| k33.. | CHLORTETRACYCLINE HCL [EYE]                       |
| k34.. | FRAMYCETIN SULFATE [EYE]                          |
| k35.. | GENTAMICIN [EYE]                                  |
| k36.. | IDOXURIDINE [EYE]                                 |
| k37.. | *MAFENIDE PROPIONATE                              |
| k38.. | *MERCURIC OXIDE [EYE]                             |
| k39.. | NEOMYCIN SULFATE [EYE]                            |
| k3a.. | POLYMYXIN B SULF [EYE]                            |
| k3b.. | PROPAMIDINE ISETHIONATE                           |
| k3c.. | SULFACETAMIDE SODIUM                              |
| k3d.. | TETRACYCLINE HCL [EYE]                            |
| k3e.. | TOBRAMYCIN [EYE]                                  |
| k3f.. | *VIDARABINE [EYE]                                 |
| k3g.. | FUSIDIC ACID [EYE]                                |
| k3h.. | NORFLOXACIN [EYE]                                 |
| k3i.. | *FOMIVIRSEN [EYE]                                 |
| k3j.. | OFLOXACIN [EYE]                                   |
| k3k.. | CIPROFLOXACIN [EYE]                               |
| k3l.. | LOMEFLOXACIN                                      |
| k3m.. | GANCICLOVIR [EYE]                                 |
| k3n.. | POVIDONE IODINE                                   |
| k4... | FUNGAL EYE INFECTIONS                             |
| k5... | SYSTEMIC PREPARATIONS - [no drugs here]           |
| k6... | CORTICOSTER + ANTI-INFL [EYE]                     |
| k61.. | ANTAZOLINE SALTS                                  |
| k62.. | BETAMETHASONE SODIUM PHOSPHATE [EYE]              |
| k63.. | CLOBETASONE BUTYRATE [EYE]                        |
| k64.. | DEXAMETHASONE [EYE]                               |

|       |                                   |
|-------|-----------------------------------|
| k65.. | FLUOROMETHOLONE                   |
| k66.. | HYDROCORTISONE ACETATE [EYE]      |
| k67.. | OXYPHENBUTAZONE                   |
| k68.. | PREDNISOLONE SOD PHOS [EYE]       |
| k69.. | SODIUM CROMOGLICATE [EYE]         |
| k6a.. | PREDNISOLONE ACETATE [EYE]        |
| k6b.. | LODOXAMIDE [EYE]                  |
| k6c.. | FLURBIPROFEN SODIUM [EYE]         |
| k6d.. | DICLOFENAC SODIUM [EYE]           |
| k6e.. | NEDOCROMIL SODIUM [EYE]           |
| k6f.. | LEVOCABASTINE HYDROCHLORIDE [EYE] |
| k6g.. | KETOROLAC TROMETAMOL [EYE]        |
| k6h.. | AZELASTINE HYDROCHLORIDE [EYE]    |
| k6i.. | EMEDASTINE [EYE]                  |
| k6j.. | RIMEXOLONE                        |
| k6k.. | KETOTIFEN [EYE]                   |
| k6l.. | OLOPATADINE [EYE]                 |
| k6m.. | LOTEPREDNOL ETABONATE             |
| k6n.. | NEPAFENAC                         |
| k6o.. | BROMFENAC                         |
| k7... | MYDRIATICS AND CYCLOPLEGICS       |
| k71.. | ATROPINE SULFATE [EYES]           |
| k72.. | CYCLOPENTOLATE HYDROCHLORIDE      |
| k73.. | HOMATROPINE HYDROBROMIDE          |
| k74.. | HYOSCINE HYDROBROMIDE [EYE]       |
| k75.. | LACHESINE CHLORIDE                |
| k76.. | PHENYLEPHRINE HCL [EYE]           |
| k77.. | TROPICAMIDE                       |
| k78.. | TROPICAMIDE+PHENYLEPHRINE         |
| k8... | TREATMENT OF GLAUCOMA             |
| k81.. | ACETAZOLAMIDE [GLAUCOMA]          |
| k82.. | ADRENALINE                        |
| k83.. | BETAXOLOL HYDROCHLORIDE [EYE]     |
| k84.. | CARBACHOL [EYE]                   |
| k85.. | CARTEOLOL HYDROCHLORIDE           |
| k86.. | DEMECARIUM BROMIDE                |
| k87.. | DICHLORPHENAMIDE                  |
| k88.. | DIPIVEFRINE HYDROCHLORIDE         |
| k89.. | ECOTHIOPATE IODIDE                |
| k8a.. | GUANETHIDINE MONOSULFATE [EYE]    |
| k8b.. | METIPRANOLOL                      |
| k8c.. | PHYSOSTIGMINE SULPHATE            |
| k8d.. | PILOCARPINE HYDROCHLORIDE         |
| k8e.. | PILOCARPINE NITRATE               |
| k8f.. | TIMOLOL MALEATE [EYE]             |

|       |                                 |
|-------|---------------------------------|
| k8g.. | LEVOBUNOLOL HYDROCHLORIDE       |
| k8h.. | DORZOLAMIDE                     |
| k8i.. | LATANOPROST [EYE]               |
| k8j.. | BRIMONIDINE                     |
| k8k.. | DORZOLAMIDE+TIMOLOL             |
| k8l.. | BRINZOLAMIDE                    |
| k8m.. | LATANOPROST+TIMOLOL             |
| k8n.. | TRAVOPROST                      |
| k8o.. | BIMATOPROST                     |
| k8p.. | BRIMONIDINE+TIMOLOL             |
| k8q.. | TIMOLOL+TRAVOPROST              |
| k8r.. | BIMATOPROST+TIMOLOL             |
| k8s.. | BRINZOLAMIDE+TIMOLOL            |
| k8t.. | TAFLUPROST                      |
| k8u.. | BRINZOLAMIDE+BRIMONIDINE        |
| k8v.. | TAFLUPROST+TIMOLOL              |
| k9... | LOCAL ANAESTHETICS [EYE]        |
| k91.. | TETRACAINE HYDROCHLORIDE        |
| k92.. | COCAINE HYDROCHLORIDE           |
| k93.. | LIDOCAINE HYDROCHLORIDE [EYE]   |
| k94.. | OXYBUPROCAINE HYDROCHLORIDE     |
| k95.. | PROXYMETACAINE HYDROCHLORIDE    |
| ka... | TEAR DEFICIENCY PREPARATIONS    |
| ka1.. | ACETYLCYSTEINE [EYES]           |
| ka2.. | HYPROMELLOSE                    |
| ka3.. | LIQUID PARAFFIN [EYE]           |
| ka4.. | POLYVINYL ALCOHOL               |
| ka5.. | HYDROXYETHYLCELLULOSE           |
| ka6.. | CARBOMER-940                    |
| ka7.. | POVIDONE                        |
| ka8.. | CARBOMERS                       |
| ka9.. | CARMELLOSE SODIUM [EYE]         |
| kaA.. | RETINOL PALMITATE               |
| kaB.. | SOYBEAN                         |
| kb... | OTHER EYE PREPARATIONS          |
| kb1.. | ACETYLCHOLINE CHLORIDE          |
| kb2.. | *CASTOR OIL [EYE]               |
| kb3.. | CHYMOTRYPSIN [EYE]              |
| kb4.. | PARAFFIN - SOFT YELLOW          |
| kb5.. | SODIUM CHLORIDE [EYE]           |
| kb6.. | THYMOXAMINE HYDROCHLORIDE [EYE] |
| kb7.. | *ZINC SULPHATE [EYE]            |
| kb8.. | SODIUM HYALURONATE              |
| kb9.. | APRACLONIDINE HYDROCHLORIDE     |
| kbA.. | HYDROXYPROPYLMETHYLCELLULOSE    |

|       |                                                       |
|-------|-------------------------------------------------------|
| kbB.. | PARAFFIN-SOFT WHITE [EYE]                             |
| kbC.. | WITCH HAZEL PRODUCT                                   |
| kbD.. | PEGAPTANIB                                            |
| kbE.. | RANIBIZUMAB                                           |
| kbF.. | HYDROXYPROPYL GUAR                                    |
| kbG.. | AFLIBERCEPT                                           |
| kc... | DIAGNOSTIC PREPARATIONS                               |
| kc1.. | FLUORESCEIN SODIUM                                    |
| kc2.. | ROSE BENGAL                                           |
| kd... | CONTACT LENSES - [no drugs here]                      |
| l.... | ENT DRUGS                                             |
| 11... | OTITIS EXT. - ASTRINGENT PREPS                        |
| 111.. | ALUMINIUM ACETATE [EAR]                               |
| 112.. | ACETIC ACID [EAR]                                     |
| 12... | OTITIS EXTERNA ANTI - INFLAMMATORY PREPARATIONS       |
| 121.. | BETAMETHASONE SODIUM PHOSPHATE [EAR]                  |
| 122.. | PREDNISOLONE SODIUM PHOSPHATE [EAR]                   |
| 13... | AURAL ANTI-INFECTIVE PREPARATIONS                     |
| 131.. | CHLORAMPHENICOL [EAR]                                 |
| 132.. | CLIOQUINOL                                            |
| 133.. | CLOTRIMAZOLE [EAR]                                    |
| 134.. | *FRAMYCETIN SULPHATE [EAR]                            |
| 135.. | GENTAMICIN [EAR]                                      |
| 136.. | NEOMYCIN SULFATE [EAR]                                |
| 137.. | TETRACYCLINE HYDROCHLORIDE [EAR]                      |
| 14... | AURAL ANTI-INFECTIVE COMPOUNDS                        |
| 141.. | AURAL ANTI-INFECTIVE COMPOUNDS                        |
| 15... | OTHER AURAL PREPARATIONS                              |
| 151.. | OTHER AURAL PREPARATIONS                              |
| 16... | *OTITIS MEDIA [no drugs here]                         |
| 17... | REMOVAL OF EAR WAX                                    |
| 171.. | REMOVAL OF EAR WAX                                    |
| 18... | NASAL ALLERGY DRUGS                                   |
| 181.. | BECLOMETASONE DIPROPIONATE [NOSE]                     |
| 182.. | BETAMETHASONE SOD PHOSPHATE [NOSE]                    |
| 183.. | BUDESONIDE [NOSE]                                     |
| 184.. | FLUNISOLIDE                                           |
| 185.. | SODIUM CROMOGLICATE [NOSE]                            |
| 186.. | IPRATROPIUM BROMIDE [2]                               |
| 187.. | AZELASTINE HYDROCHLORIDE                              |
| 188.. | FLUTICASONE [NOSE]                                    |
| 189.. | NEDOCROMIL SODIUM [NOSE]                              |
| 18A.. | LEVOCABASTINE HYDROCHLORIDE [NOSE]                    |
| 18B.. | TRIAMCINOLONE ACETONIDE [NOSE]                        |
| 18C.. | TRAMAZOLINE HYDROCHLORIDE+DEXAMETHASONE ISONICOTINATE |

|       |                                                 |
|-------|-------------------------------------------------|
| 18D.. | MOMETASONE FUROATE MONOHYDRATE [NOSE]           |
| 18E.. | AZELASTINE HYDROCHLORIDE+FLUTICASONE PROPIONATE |
| 19... | TOPICAL NASAL DECONGESTANTS                     |
| 191.. | EPHEDRINE HYDROCHLORIDE [NOSE]                  |
| 192.. | OXYMETAZOLINE HYDROCHLORIDE                     |
| 193.. | PHENYLEPHRINE HYDROCHLORIDE [NOSE]              |
| 194.. | XYLOMETAZOLINE HYDROCHLORIDE                    |
| 195.. | *COMPOUND NASAL DECONGESTANTS                   |
| 1a... | ANTI-INFECTIVE NASAL PREPS.                     |
| 1A... | OTHER NASAL PREPARATIONS                        |
| 1a1.. | ANTI-INFECTIVE NASAL PREPS.                     |
| 1A1.. | SODIUM CHLORIDE [NOSE]                          |
| 1A2.. | GLUCOSE+GLYERCOL                                |
| 1A3.. | CELLULOSE                                       |
| 1A4.. | SESAME OIL                                      |
| 1b... | APHTHOUS MOUTH ULCER DRUGS                      |
| 1b1.. | BENZYDAMINE HYDROCHLORIDE                       |
| 1b2.. | CARBENOXOLONE SODIUM [MOUTH]                    |
| 1b3.. | CARMELLOSE SODIUM                               |
| 1b4.. | CORTICOSTEROIDS FOR OROPHARYNX                  |
| 1b5.. | LOCAL ANAESTHETICS-OROPHARYNX                   |
| 1b6.. | SALICYLATES - FOR OROPHARYNX                    |
| 1b7.. | TETRACYCLINE FOR OROPHARYNX                     |
| 1c... | OROPHARYNGEAL ANTI-INFECTIVES                   |
| 1c1.. | AMPHOTERICIN [OROPHARYNGEAL]                    |
| 1c2.. | DEQUALINIUM CHLORIDE                            |
| 1c3.. | *IDOXURIDINE [MOUTH- no preps]                  |
| 1c4.. | MICONAZOLE [OROPHARYNGEAL]                      |
| 1c5.. | *NATAMYCIN [MOUTH-no preps]                     |
| 1c6.. | NYSTATIN [MOUTH]                                |
| 1c7.. | *POLYNOXYLIN                                    |
| 1c8.. | TETRACYCLINE [mouth-no drugs here]              |
| 1c9.. | MINOCYCLINE HYDROCHLORIDE                       |
| 1cA.. | METRONIDAZOLE BENZOATE [OROPHARYNG]             |
| 1d... | ANTISEPTIC LOZENGES AND SPRAYS                  |
| 1d1.. | ANTISEPTIC LOZENGES AND SPRAYS                  |
| 1e... | MOUTH-WASHES/GARGLES/DENTIFRICES                |
| 1e1.. | CETYLPYRIDINIUM CHLORIDE                        |
| 1e2.. | CHLORHEXIDINE GLUCONATE                         |
| 1e3.. | HEXETIDINE                                      |
| 1e4.. | HYDROGEN PEROXIDE [MOUTH]                       |
| 1e5.. | PHENOL [MOUTH]                                  |
| 1e6.. | POVIDONE-IODINE [MOUTH]                         |
| 1e7.. | SODIUM CHLORIDE [MOUTH]                         |
| 1e8.. | SODIUM PERBORATE                                |

|       |                                                  |
|-------|--------------------------------------------------|
| le9.. | THYMOL                                           |
| leA.. | POVIDONE [MOUTH]                                 |
| leB.. | OTHER MOUTHWASH                                  |
| leC.. | OTHER DENTIFRICES                                |
| lf..  | OTHER OROPHARYNGEAL PREPARATIONS                 |
| lf1.. | OTHER OROPHARYNGEAL PREPARATIONS                 |
| lf2.. | PILOCARPINE HYDROCHLORIDE [OROPHARYNGEAL]        |
| lf3.. | FLURBIPROFEN [OROPHARYNGEAL]                     |
| lf4.. | HYALURONIC ACID                                  |
| m.... | SKIN DRUGS                                       |
| m1... | VEHICLES AND DILUENTS                            |
| m11.. | VEHICLES + DILUENTS : CREAMS                     |
| m12.. | VEHICLES+DILUENTS : OINTMENTS                    |
| m13.. | VEHICLES + DILUENTS : LOTIONS - [no drugs here]  |
| m14.. | VEHICLES+DILUENTS:SHAKE LOTION - [no drugs here] |
| m15.. | VEHICLES + DILUENTS : PASTES                     |
| m16.. | VEHICLES+DILUENTS:APPLICATIONS - [no drugs here] |
| m17.. | VEHICLES+DILUENTS:COLLODIONS                     |
| m18.. | VEHICLES + DILUENTS: LINIMENTS - [no drugs here] |
| m19.. | VEHICLES + DILUENTS : PAINTS - [no drugs here]   |
| m2... | EMOLLIENTS + BARRIER PREPARATIONS                |
| m21.. | EMOLLIENTS/BARRIER CREAMS: A-E                   |
| m22.. | EMOLLIENTS/BARRIER CREAMS: F-O                   |
| m23.. | EMOLLIENTS/BARRIER CREAMS: P-Z                   |
| m24.. | UREA CREAMS AND LOTIONS                          |
| m25.. | EMOLLIENT BATH ADDITIVES                         |
| m26.. | DUSTING POWDERS                                  |
| m27.. | ANTISEPTIC EMOLLIENTS                            |
| m28.. | EMOLLIENTS/BARRIER CREAMS:A-E (1)                |
| m29.. | EMOLLIENT BATH ADDITIVES (2)                     |
| m3... | LOCAL ANAESTHETIC/ANTIPRURITIC                   |
| m31.. | CALAMINE                                         |
| m32.. | CROTAMITON [ANTIPRURITIC]                        |
| m33.. | LOCAL ANAESTHETICS [SKIN]                        |
| m34.. | TOPICAL ANTIHISTAMINES                           |
| m35.. | DOXEPIN HYDROCHLORIDE [ANTIPRURITIC]             |
| m36.. | MENTHOL IN AQUEOUS CREAM                         |
| m37.. | TOPICAL SKIN COOLANTS                            |
| m4... | TOPICAL CORTICOSTEROIDS                          |
| m41.. | HYDROCORTISONE CREAMS                            |
| m42.. | HYDROCORTISONE OINTMENTS                         |
| m43.. | HYDROCORTISONE LOTIONS/DRESSNG                   |
| m44.. | HYDROCORTISONE COMPOUND PREPARATIONS             |
| m45.. | HYDROCORTISONE+ANTIMICROBIALS                    |
| m46.. | ALCLOMETASONE DIPROPIONATE                       |

|       |                                   |
|-------|-----------------------------------|
| m47.. | BECLOMETASONE DIPROP [SKIN]       |
| m48.. | BETAMETHASONE ESTERS              |
| m49.. | BETAMETHASONE + ANTIMICROBIALS    |
| m4a.. | CLOBETASOL PROPIONATE             |
| m4b.. | CLOBETASONE BUTYRATE [SKIN]       |
| m4c.. | *DESONIDE                         |
| m4d.. | DESOXIMETASONE                    |
| m4e.. | DIFLUCORTOLONE VALERATE           |
| m4f.. | FLUCLOROLONE ACETONIDE            |
| m4g.. | FLUOCINOLONE ACETONIDE            |
| m4h.. | FLUOCINONIDE                      |
| m4i.. | FLUOCORTOLONE                     |
| m4j.. | FLUDROXYCORTIDE                   |
| m4k.. | HALCINONIDE                       |
| m4l.. | HYDROCORTISONE BUTYRATE           |
| m4m.. | METHYLPREDNISOLONE ACETATE        |
| m4n.. | TRIAMCINOLONE ACETONIDE [SKIN]    |
| m4o.. | BUDESONIDE TOPICAL                |
| m4p.. | HYDROCORTISONE ACETATE [TOPICAL]  |
| m4q.. | MOMETASONE FUROATE [TOPICAL]      |
| m4r.. | FLUTICASONE PROPIONATE[SKIN]      |
| m4s.. | MOMETASONE FUROATE MONOHYDRATE    |
| m5... | PSORIASIS AND ECZEMA PREPARATIONS |
| m51.. | COAL TAR                          |
| m52.. | *BUFEXAMAC                        |
| m53.. | DITHRANOL                         |
| m54.. | DITHRANOL TRIACETATE              |
| m55.. | *ETRETINATE                       |
| m56.. | ICHTHAMMOL                        |
| m57.. | SALICYLIC ACID [PSORIASIS]        |
| m58.. | GAMOLENIC ACID                    |
| m59.. | CALCIPOTRIOL                      |
| m5A.. | ACITRETIN                         |
| m5B.. | TACALCITOL                        |
| m5C.. | TAZAROTENE                        |
| m5D.. | COAL TAR [2]                      |
| m5E.. | TACROLIMUS [SKIN]                 |
| m5F.. | PIMECROLIMUS                      |
| m5G.. | PINE TAR                          |
| m5H.. | ALITRETINOIN                      |
| m5z.. | DITHRANOL [GENERIC ADDITIONS]     |
| m6... | ACNE - TOPICAL PREPARATIONS       |
| m61.. | ABRASIVE AGENTS - ACNE            |
| m62.. | BENZOYL PEROXIDE [ACNE]           |
| m63.. | SULFUR                            |

|       |                                      |
|-------|--------------------------------------|
| m64.. | *TETRACYCLINES [SKIN]                |
| m65.. | TRETINOIN [SKIN]                     |
| m66.. | CORTICOSTEROIDS [SKIN]               |
| m67.. | ERYTHROMYCIN [SKIN]                  |
| m68.. | CLINDAMYCIN [SKIN]                   |
| m69.. | ISOTRETINOIN [TOPICAL]               |
| m6A.. | AZELAIC ACID                         |
| m6B.. | SALICYLIC ACID [ACNE]                |
| m6C.. | NICOTINAMIDE [SKIN]                  |
| m6D.. | ADAPALENE                            |
| m6z.. | BENZOYL PEROXIDE [GENERIC ADDITIONS] |
| m7... | ACNE - ORAL PREPARATIONS             |
| m71.. | CYPROTERONE ACETATE [ACNE]           |
| m72.. | ISOTRETINOIN                         |
| m8... | WARTS AND CALLUSES                   |
| m81.. | SALICYLIC ACID [CALLOSITY]           |
| m82.. | BROMINE COMPLEXES                    |
| m83.. | FORMALDEHYDE                         |
| m84.. | GLUTARALDEHYDE                       |
| m85.. | PODOPHYLLUM RESIN                    |
| m86.. | PODOPHYLLOTOXIN                      |
| m87.. | DIMETHYL-ETHER PROPANE               |
| m88.. | SILVER NITRATE [WARTS]               |
| m89.. | POTASSIUM HYDROXIDE                  |
| m9... | SUNSCREENING PREPARATIONS            |
| m91.. | SUNSCREENING PREPARATIONS A-Z        |
| m92.. | SUNSCREENING PREPARATIONS A-Z [2]    |
| ma... | CAMOUFLAGING PREPARATIONS            |
| ma1.. | CAMOUFLAGING PREPARATIONS A-Z        |
| ma3.. | CAMOUFLAGING PREPARATIONS[2] A-Z     |
| ma4.. | CAMOUFLAGING PREPARATIONS[3] A-Z     |
| mb... | SCALP PREPARATIONS                   |
| mb1.. | SHAMPOOS                             |
| mb2.. | SCALP APPLICATIONS                   |
| mb3.. | MINOXIDIL [ANDROGEN ALOPECIA]        |
| mb4.. | LITHIUM SUCCINATE [TOPICAL]          |
| mb5.. | SHAMPOOS [2]                         |
| mc... | ANTIBACTERIAL TOPICAL PREPARATIONS   |
| mc1.. | CHLORAMPHENICOL [SKIN]               |
| mc2.. | COLISTIN SULFATE                     |
| mc3.. | FRAMYCETIN SULFATE [SKIN]            |
| mc4.. | *MAFENIDE                            |
| mc5.. | MUPIROCIN                            |
| mc6.. | NEOMYCIN SULFATE [SKIN]              |
| mc7.. | *NITROFURAZONE                       |



|       |                                            |
|-------|--------------------------------------------|
| mc8.. | POLYMYXIN B SULFATE [SKIN]                 |
| mc9.. | SILVER SULFADIAZINE                        |
| mcA.. | RETAPAMULIN                                |
| md..  | ANTIBACT. - SYSTEMIC USE ALSO              |
| md1.. | CHLORTETRACYCLINE HYDROCHLORIDE [SKIN]     |
| md2.. | FUSIDIC ACID                               |
| md3.. | GENTAMICIN [SKIN]                          |
| md4.. | TETRACYCLINE HYDROCHLORIDE [SKIN]          |
| me..  | ANTIFUNGAL PREPARATIONS                    |
| me1.. | *AMPHOTERICIN [SKIN]                       |
| me2.. | BENZOIC ACID                               |
| me3.. | BENZOYL PEROXIDE [ANTIFUNGAL]              |
| me4.. | CLOTRIMAZOLE [SKIN]                        |
| me5.. | ECONAZOLE NITRATE [SKIN]                   |
| me6.. | KETOCONAZOLE [SKIN]                        |
| me7.. | MICONAZOLE NITRATE [SKIN]                  |
| me8.. | *NATAMYCIN [SKIN]                          |
| me9.. | *NITROPHENOL                               |
| mea.. | NYSTATIN [SKIN]                            |
| meb.. | SALICYLIC ACID [ANTIFUNGAL]                |
| mec.. | SULCONAZOLE NITRATE                        |
| med.. | TOLNAFTATE                                 |
| mee.. | UNDECENOATES                               |
| mef.. | TIOCONAZOLE                                |
| meg.. | METRONIDAZOLE [SKIN]                       |
| meh.. | AMOROLFINE HYDROCHLORIDE                   |
| mej.. | TERBINAFINE HYDROCHLORIDE [2]              |
| mek.. | BIFONAZOLE (SKIN)                          |
| mel.. | FLUTRIMAZOLE                               |
| mf..  | ANTIVIRAL PREPARATIONS                     |
| mf1.. | ACICLOVIR [SKIN]                           |
| mf2.. | IDOXURIDINE+DIMETHYLSULFOXIDE              |
| mf3.. | PENCICLOVIR [SKIN]                         |
| mg..  | PARASITICIDAL PREPARATIONS                 |
| mg1.. | BENZYL BENZOATE                            |
| mg2.. | CARBARYL                                   |
| mg3.. | CROTAMITON [ANTIPARASITIC - no drugs here] |
| mg4.. | LINDANE                                    |
| mg5.. | MALATHION                                  |
| mg6.. | MONOSULFIRAM                               |
| mg7.. | PHENOTHRIN                                 |
| mg8.. | PERMETHRIN                                 |
| mh..  | MINOR SKIN INFECTION PREPARATIONS          |
| mh1.. | MINOR SKIN INFECTION PREPARATIONS A-Z      |
| mi..  | DISINFECTING/CLEANSING AGENTS              |

|       |                                      |
|-------|--------------------------------------|
| mi1.. | ALCOHOL                              |
| mi2.. | ALUMINIUM ACETATE                    |
| mi3.. | BENZALKONIUM CHLORIDE                |
| mi4.. | CETRIMIDE                            |
| mi5.. | CHLORHEXIDINE A-H                    |
| mi6.. | CHLORHEXIDINE I-Z                    |
| mi7.. | CHLORINATED SOLUTIONS                |
| mi8.. | CHLOROXYLENOL                        |
| mi9.. | CRYSTAL VIOLET                       |
| mia.. | HEXACHLOROPHENE                      |
| mib.. | HYDROGEN PEROXIDE [SKIN]             |
| mic.. | IODINE COMPOUNDS                     |
| mid.. | POTASSIUM PERMANGANATE               |
| mie.. | SILVER NITRATE [DISINFECTANT]        |
| mif.. | SODIUM CHLORIDE [SKIN]               |
| mig.. | SOFT SOAP                            |
| mih.. | TRICLOSAN                            |
| mii.. | ZINC SULFATE [SKIN]                  |
| mij.. | WATER FOR IRRIGATION                 |
| mik.. | COMBINATION WOUND CLEANSERS          |
| mil.. | OCTENIDINE                           |
| mim.. | POLIHEXANIDE                         |
| mj... | DESLOUGHING AGENTS                   |
| mj1.. | ASERBINE                             |
| mk... | SOAP SUBSTITUTES - [no drugs here]   |
| ml... | ANTIPERSPIRANTS                      |
| ml1.. | ALUMINIUM CHLORIDE                   |
| ml2.. | GLYCOPYRROLATE                       |
| mn... | WOUND/ULCER PREPARATIONS             |
| mn1.. | CLEANSING PREPARATIONS               |
| mn2.. | DRESSINGS                            |
| mn3.. | TISSUE ADHESIVE                      |
| mn4.. | BECAPLERMIN                          |
| mn5.. | PALIFERMIN                           |
| mn6.. | CLEANSING PREPARATIONS(2)            |
| mn7.. | DRESSINGS(2)                         |
| mn8.. | PHYSICAL DEBRIDEMENT DEVICE          |
| mn9.. | DRESSINGS (3)                        |
| mo... | CIRCULATORY TOPICAL PREPARATIONS     |
| mo1.. | CIRCULATORY TOPICAL PREPARATIONS A-Z |
| mp... | ELECTRODE+ULTRASOUND GELS AND CREAMS |
| mp1.. | ELECTRODE GEL                        |
| mp2.. | ULTRASOUND COUPLING GEL              |
| mp3.. | ELECTRODE CREAM                      |
| mq... | SKIN BLEACHING PREPARATIONS          |

|       |                                                                          |
|-------|--------------------------------------------------------------------------|
| mq1.. | HYDROQUINONE                                                             |
| mr... | PHARMACEUTICAL SOLVENTS                                                  |
| mr1.. | SOLVENT ETHER                                                            |
| mr2.. | ACETONE PRODUCT                                                          |
| ms... | NAIL BED PREPARATIONS                                                    |
| ms1.. | PHENOL [PODIATRY]                                                        |
| mt... | ACTINIC KERATOSES PREPARATIONS                                           |
| mt1.. | DICLOFENAC SODIUM [ACTINIC KERATOSIS]                                    |
| mt2.. | INGENOL MEBUTATE                                                         |
| mu... | HIRSUTISM PREPARATIONS                                                   |
| mu1.. | EFLORNITHINE                                                             |
| mv... | OTHER DERMATOLOGICAL PREPARATIONS                                        |
| mv1.. | IVERMECTIN                                                               |
| n...  | IMMUNOLOGY DRUGS AND VACCINES                                            |
| n1... | ACTIVE IMMUNITY [no drugs here]                                          |
| n2... | PASSIVE IMMUNITY [no drugs here]                                         |
| n3... | STORAGE AND USE OF VACCINES [no drugs here]                              |
| n4... | VACCINES AND ANTISERA                                                    |
| n41.. | ANTHRAX VACCINE                                                          |
| n42.. | BCG VACCINES                                                             |
| n43.. | BOTULISM ANTITOXIN                                                       |
| n44.. | CHOLERA VACCINE                                                          |
| n45.. | DIPHThERIA VACCINES                                                      |
| n46.. | HEPATITIS B VACCINE                                                      |
| n47.. | INFLUENZA VACCINES                                                       |
| n48.. | *MEASLES VACCINE                                                         |
| n49.. | MUMPS VACCINE                                                            |
| n4a.. | PERTUSSIS VACCINE                                                        |
| n4b.. | PNEUMOCOCCAL VACCINE                                                     |
| n4c.. | POLIOMYELITIS VACCINE                                                    |
| n4d.. | RABIES VACCINE                                                           |
| n4e.. | RUBELLA VACCINE                                                          |
| n4f.. | SMALLPOX VACCINE                                                         |
| n4g.. | TETANUS VACCINES                                                         |
| n4h.. | TYPHOID VACCINE                                                          |
| n4i.. | *TYPHUS VACCINE                                                          |
| n4j.. | YELLOW FEVER VACCINE                                                     |
| n4k.. | MEASLES/MUMPS/RUBELLA VACCINE                                            |
| n4l.. | MENINGITIS VACCINE                                                       |
| n4m.. | HEPATITIS A VACCINE                                                      |
| n4n.. | HAEMOPHILUS INFLUENZAE Type b (Hib) VACCINE                              |
| n4o.. | *MEASLES+RUBELLA VACCINE                                                 |
| n4p.. | HAEMOPHILUS INFLUENZAE TYPE b (HIB)/DIPHThERIA/TETANUS/PERTUSSIS VACCINE |
| n4q.. | JAPANESE B ENCEPHALITIS VACCINE                                          |

|       |                                                                    |
|-------|--------------------------------------------------------------------|
| n4r.. | TICK-BORNE ENCEPHALITIS VACCINE                                    |
| n4s.. | HEPATITIS A+B VACCINE                                              |
| n4t.. | PLAGUE VACCINE                                                     |
| n4u.. | HEPATITIS A+TYPHOID VACCINE                                        |
| n4v.. | VARICELLA-ZOSTER VACCINE                                           |
| n4w.. | ROTAVIRUS VACCINE                                                  |
| n4x.. | HAEMOPHILUS INFLUENZAE type b + MENINGITIS C VACCINE               |
| n4y.. | HAEMOPHILUS INFLUENZAE type B/DIPHThERIA/TETANUS/PERTUSSIS/POLIO V |
| n4z.. | HUMAN PAPILLOMAVIRUS VACCINE                                       |
| n5... | IMMUNOGLOBULINS                                                    |
| n51.. | NORMAL IMMUNOGLOBULIN                                              |
| n52.. | SPECIFIC IMMUNOGLOBULINS                                           |
| n53.. | ANTI-D (RH) IMMUNOGLOBULIN                                         |
| n54.. | HUMAN TICK-BORNE ENCEPHALITIS IMMUNOGLOBULIN                       |
| n55.. | NORMAL IMMUNOGLOBULIN(2)                                           |
| n56.. | NORMAL IMMUNOGLOBULIN(3)                                           |
| n6... | VACCINATION PROGRAMMES -[no drugs here]                            |
| n7... | INTERNATIONAL TRAVEL - [no drugs here]                             |
| n8... | HUMAN MONOCLONAL IgM ANTIBODY                                      |
| n81.. | *HA-1A                                                             |

**Codes used to identify all-cause dementia and Alzheimer's disease cases****All-cause dementia - ICD-10**

| <b>Description</b>                                                        | <b>Code</b> |
|---------------------------------------------------------------------------|-------------|
| Dementia in Alzheimer's disease                                           | F00         |
| Dementia in Alzheimer's disease with early onset                          | F00.0       |
| Dementia in Alzheimer's disease with late onset                           | F00.1       |
| Dementia in Alzheimer's disease, atypical or mixed type                   | F00.2       |
| Dementia in Alzheimer's disease, unspecified                              | F00.9       |
| Alzheimer's disease                                                       | G30         |
| Alzheimer's disease with early onset                                      | G30.0       |
| Alzheimer's disease with late onset                                       | G30.1       |
| Other Alzheimer's disease                                                 | G30.8       |
| Alzheimer's disease unspecified                                           | G30.9       |
| Vascular dementia                                                         | F01         |
| Vascular dementia of acute onset                                          | F01.0       |
| Multi-infarct dementia                                                    | F01.1       |
| Subcortical vascular dementia                                             | F01.2       |
| Mixed cortical and sub-cortical vascular dementia                         | F01.3       |
| Other vascular dementia                                                   | F01.8       |
| Vascular dementia, unspecified                                            | F01.9       |
| Binswanger's disease                                                      | I67.3       |
| Dementia in Picks disease                                                 | F02.0       |
| Circumscribed brain atrophy                                               | G31.0       |
| Sporadic Creutzfeldt-Jacob disease                                        | A81.0       |
| Dementia in Creutzfeldt-Jacob disease                                     | F02.1       |
| Dementia in Huntington's disease                                          | F02.2       |
| Dementia in Parkinson's disease                                           | F02.3       |
| Dementia in HIV disease                                                   | F02.4       |
| Mental and behavioural disorders due to use of alcohol - amnesic syndrome | F10.6       |
| Dementia in other diseases classified elsewhere                           | F02         |
| Dementia in other specified diseases classified elsewhere                 | F02.8       |
| Unspecified dementia                                                      | F03         |
| Delirium superimposed on dementia                                         | F05.1       |
| Senile degeneration of brain                                              | G31.1       |
| Other specified degenerative diseases of nervous system                   | G31.8       |

**All-cause dementia - Read version 2**

| <b>Description</b>                                          | <b>Code</b> |
|-------------------------------------------------------------|-------------|
| [X] Dementia in Alzheimer's disease                         | Eu00.       |
| [X] Dementia in Alzheimer's disease with early onset        | Eu000       |
| [X] Dementia in Alzheimer's disease with late onset         | Eu001       |
| [X] Dementia in Alzheimer's disease, atypical or mixed type | Eu002       |
| [X] Dementia in Alzheimer's disease, unspecified            | Eu00z       |

|                                                                                                       |       |
|-------------------------------------------------------------------------------------------------------|-------|
| Alzheimer's disease                                                                                   | F110. |
| Alzheimer's disease with early onset                                                                  | F1100 |
| Alzheimer's disease with late onset                                                                   | F1101 |
| Senile degeneration of brain                                                                          | F112. |
| [X] Other Alzheimer's disease                                                                         | Fyu30 |
| Multi-infarct dementia                                                                                | E004. |
| Uncomplicated arteriosclerotic dementia                                                               | E0040 |
| Arteriosclerotic dementia with delirium                                                               | E0041 |
| Arteriosclerotic dementia with paranoia                                                               | E0042 |
| Arteriosclerotic dementia with depression                                                             | E0043 |
| Arteriosclerotic dementia NOS                                                                         | E004z |
| [X]Vascular dementia                                                                                  | Eu01. |
| [X]Vascular dementia of acute onset                                                                   | Eu010 |
| [X]Multi-infarct dementia                                                                             | Eu011 |
| [X]Other vascular dementia                                                                            | Eu01y |
| [X]Vascular dementia, unspecified                                                                     | Eu01z |
| Cerebral degeneration due to cerebrovascular disease                                                  | F11x2 |
| Binswanger's disease                                                                                  | F21y2 |
| [X] Lewy body dementia                                                                                | Eu025 |
| Lewy body disease                                                                                     | F116. |
| [X] Dementia in Picks disease                                                                         | Eu020 |
| Pick's disease                                                                                        | F111. |
| Frontotemporal degeneration                                                                           | F118. |
| Jakob-Creutzfeldt disease                                                                             | A411. |
| Sporadic Creutzfeldt-Jakob disease                                                                    | A4110 |
| Alcoholic dementia, NOS                                                                               | E012. |
| Dementia in conditions EC                                                                             | E041. |
| [X] Dementia in other diseases classified elsewhere                                                   | Eu02. |
| [X] Dementia in Creutzfeldt-Jacob disease                                                             | Eu021 |
| [X] Dementia in Huntington's disease                                                                  | Eu022 |
| [X] Dementia in Parkinson's disease                                                                   | Eu023 |
| [X] Dementia in HIV disease                                                                           | Eu024 |
| [X]Dementia in other specified diseases classified elsewhere                                          | Eu02y |
| [X]Mental and behavioural disorders due to use of alcohol: amnesic syndrome                           | Eu106 |
| [X]Mental and behavioural disorders due to use of alcohol: residual and late-onset psychotic disorder | Eu107 |
| Cerebral degeneration due to Jacob-Creutzfeldt disease                                                | F11x7 |
| Cerebral degeneration due to Parkinson's disease                                                      | F11x9 |
| Corticobasal degeneration                                                                             | F11y2 |
| H/O: dementia                                                                                         | 1461. |
| Assessment of psychotic and behavioural symptoms of dementia                                          | 38C13 |
| GDS level 4 - moderate cognitive decline                                                              | 3AE3. |
| GDS level 5 - moderately severe cognitive decline                                                     | 3AE4. |
| GDS level 6 - severe cognitive decline                                                                | 3AE5. |
| GDS level 7 - very severe cognitive decline                                                           | 3AE6. |

|                                                               |       |
|---------------------------------------------------------------|-------|
| Dementia monitoring                                           | 66h.. |
| Dementia annual review                                        | 6AB.. |
| Dementia medication review                                    | 8BM02 |
| Shared care – prescribing drug for dementia                   | 8BM50 |
| Shared care – prescribing drug for dementia declined          | 8BM60 |
| Antipsyc drug therapy dementia                                | 8BPa. |
| Dementia advance care plan                                    | 8CMe0 |
| Review of dementia advance care plan                          | 8CMG2 |
| Dementia care plan                                            | 8CMZ. |
| Dementia care plan agreed                                     | 8CMZ0 |
| Dementia care plan reviewed                                   | 8CMZ1 |
| Dementia care plan declined                                   | 8CMZ2 |
| Dementia care plan review declined                            | 8CMZ3 |
| Dementia advance care plan agreed                             | 8CSA. |
| Referral to dementia care advisor                             | 8Hla. |
| Dementia adv care plan declnd                                 | 8IAe0 |
| Dementia advance care plan review declined                    | 8IAe2 |
| Exception reporting: dementia quality indicators              | 9hD.. |
| Excepted from dementia quality indicators: patient unsuitable | 9hD0. |
| Excepted from dementia quality indicators: informed dissent   | 9hD1. |
| Dementia monitoring administration                            | 9Ou.. |
| Dementia monitoring first letter                              | 9Ou1. |
| Dementia monitoring second letter                             | 9Ou2. |
| Dementia monitoring third letter                              | 9Ou3. |
| Dementia monitoring verbal invite                             | 9Ou4. |
| Dementia monitoring telephone invite                          | 9Ou5. |
| Senile and presenile organic psychotic condition              | E00.. |
| Uncomplicated senile dementia                                 | E000. |
| Pre-senile dementia                                           | E001. |
| Uncomplicated pre-senile dementia                             | E0010 |
| Pre-senile dementia with delirium                             | E0011 |
| Pre-senile dementia with paranoia                             | E0012 |
| Pre-senile dementia with depression                           | E0013 |
| Pre-senile dementia NOS                                       | E001z |
| Senile dementia with depressive or paranoid features          | E002. |
| Senile dementia with paranoia                                 | E0020 |
| Senile dementia with depression                               | E0021 |
| Senile dementia with depressive or paranoid features NOS      | E002z |
| Senile dementia with delirium                                 | E003. |
| Drug induced dementia                                         | E02y1 |
| [X]Sub-cortical vascular dementia                             | Eu012 |
| [X]Mixed cortical and sub-cortical vascular dementia          | Eu013 |
| [X] Unspecified dementia                                      | Eu02z |
| [X] Delirium superimposed on dementia                         | Eu041 |

**Alzheimer's disease – ICD-10**

| Description                                             | Code  |
|---------------------------------------------------------|-------|
| Dementia in Alzheimer's disease                         | F00   |
| Dementia in Alzheimer's disease with early onset        | F00.0 |
| Dementia in Alzheimer's disease with late onset         | F00.1 |
| Dementia in Alzheimer's disease, atypical or mixed type | F00.2 |
| Dementia in Alzheimer's disease, unspecified            | F00.9 |
| Alzheimer's disease                                     | G30   |
| Alzheimer's disease with early onset                    | G30.0 |
| Alzheimer's disease with late onset                     | G30.1 |
| Other Alzheimer's disease                               | G30.8 |
| Alzheimer's disease unspecified                         | G30.9 |

#### Alzheimer's disease – Read V2

| Description                                                 | Code  |
|-------------------------------------------------------------|-------|
| [X] Dementia in Alzheimer's disease                         | Eu00. |
| [X] Dementia in Alzheimer's disease with early onset        | Eu000 |
| [X] Dementia in Alzheimer's disease with late onset         | Eu001 |
| [X] Dementia in Alzheimer's disease, atypical or mixed type | Eu002 |
| [X] Dementia in Alzheimer's disease, unspecified            | Eu00z |
| Alzheimer's disease                                         | F110. |
| Alzheimer's disease with early onset                        | F1100 |
| Alzheimer's disease with late onset                         | F1101 |
| Senile degeneration of brain                                | F112. |
| [X] Other Alzheimer's disease                               | Fyu30 |

Further code lists used to derive the Secure Anonymised Information Linkage databank Dementia electronic Cohort (SAIL-DeC) are available at: <https://datashare.is.ed.ac.uk/handle/10283/3268>.

The construction of SAIL-DeC is outlined in Schnier C, Wilkinson T et al. *Cohort profile: The Secure Anonymised Information Linkage databank Dementia e-cohort (SAIL-DeC)*. International Journal of Population Data Science. 2020 Feb 25;5(1).



## **Supplementary Results: Medications predicted a priori to be associated with dementia (Group 1)**

### **Neurodegenerative diseases**

All drugs in the 'Drugs used in parkinsonism and related disorders' (BNF section 4.9) section were associated with dementia (HR range 2.86-8.55).

### **Cardiovascular diseases**

Many medications prescribed for cardiovascular diseases were associated with dementia, across multiple BNF sections. This included drugs such as: digoxin (HR 1.67); diuretics, such as furosemide (HR 1.54) and spironolactone (HR 1.45), beta-adrenoreceptor blocking drugs, such as propranolol (HR 1.29); nitrates; anticoagulants such as warfarin (HR 1.34) and rivaroxaban (HR 2.08); antiplatelets, such as aspirin (HR 1.60), dipyridamole (HR 2.21) and clopidogrel (HR 1.70) and statins.

### **Diabetes**

Almost all drugs for diabetes were associated or tentatively associated with an increased dementia incidence. Most of the medications that were not associated had similar hazard ratios, but with small numbers of cases exposed.

### **Depression**

Lithium (BNF section 4.2 - Drugs used in psychoses and related disorders) was associated with dementia with a large effect size (HR 3.59).

Among antidepressants (BNF section 4.3 - Antidepressant drugs), paroxetine, venlafaxine, citalopram, reboxetine, mirtazapine and escitalopram were all associated with dementia (HR range 1.61-2.95) with nefazodone tentatively associated (HR 1.73). Other drugs in this section had similar HRs, but with small numbers of cases exposed.

### **Symptoms of complications of dementia**

All drugs in the section 'Drugs used in psychoses and related disorders' (BNF section 4.2) were associated with dementia, with large effect sizes (HR range 2.95-7.32), except for levomepromazine (also used as an antiemetic), which had few cases exposed (HR 1.91).

Many medications under sections such as 'fluids and electrolytes', 'oral nutrition', 'minerals' and 'vitamins' were associated with dementia. Of note, thiamine and 'vitamin B complex', often prescribed in alcohol-dependence syndrome, had very large hazard ratios (HR 5.64 and 2.94 respectively).
